# Supplementary material
Source: PubMed Central journal article supplement (PMC4425568)
Supplement: NIHMS638325-supplement-01.pdf [file NIHMS638325-supplement-01.pdf]

## Genome-wide association study of kidney function decline: the CKDGen Consortium

### Supplementary Information

|                               |                |
|-------------------------------|----------------|
| <b>Supplementary Table 1</b>  | <b>Page 2</b>  |
| <b>Supplementary Table 2</b>  | <b>Page 17</b> |
| <b>Supplementary Table 3</b>  | <b>Page 24</b> |
| <b>Supplementary Table 4</b>  | <b>Page 26</b> |
| <b>Supplementary Table 5</b>  | <b>Page 27</b> |
| <b>Supplementary Table 6</b>  | <b>Page 28</b> |
| <br>                          |                |
| <b>Supplementary Figure 1</b> | <b>Page 29</b> |
| <br>                          |                |
| <b>References</b>             | <b>Page 38</b> |

**Supplementary Table 1.** Study-specific methods and full acknowledgments – stage 1 and stage 2 cohorts.

| Study name (key references) | Study design                    | Total genotype d sample size | Study exclusions or disease enrichment | Exclusions                                                                                                                                                          | Creatinine measurements                                                                                                                                                                                                                                                                | Serial creatinine measurements                                                                                                                                      | Acknowledgments and funding source                                                                                                                                                                                                                                                                                                                                                                                                                                                                                                                                                                                                                                                                                                 |
|-----------------------------|---------------------------------|------------------------------|----------------------------------------|---------------------------------------------------------------------------------------------------------------------------------------------------------------------|----------------------------------------------------------------------------------------------------------------------------------------------------------------------------------------------------------------------------------------------------------------------------------------|---------------------------------------------------------------------------------------------------------------------------------------------------------------------|------------------------------------------------------------------------------------------------------------------------------------------------------------------------------------------------------------------------------------------------------------------------------------------------------------------------------------------------------------------------------------------------------------------------------------------------------------------------------------------------------------------------------------------------------------------------------------------------------------------------------------------------------------------------------------------------------------------------------------|
| <b>Stage 1 cohorts</b>      |                                 |                              |                                        |                                                                                                                                                                     |                                                                                                                                                                                                                                                                                        |                                                                                                                                                                     |                                                                                                                                                                                                                                                                                                                                                                                                                                                                                                                                                                                                                                                                                                                                    |
| AGES [1]                    | Population-based                | 3,664                        | None                                   | Sample exclusion criteria included sample failure, genotype mismatch with reference panel, and sex mismatch, resulting in clean genotype data on 3,219 individuals. | AGES: Serum creatinine was measured using the Roche-Hitachi 912 instrument with Roche Creatinine Jaffé compensated method; Roche Diagnostics, Mannheim, Germany. AGESII: Serum creatinine was measured using the Roche-Hitachi P-Module instrument with Roche Creatininase Plus assay. | Serum creatinine a was measured at baseline (AGES:2002-2006), and at a follow-up five years later (AGESII:2007-2011). Individuals were recruited in the same order. | AGES: This study has been funded by NIH contract N01-AG-1-2100, the NIA Intramural Research Program, Hjartavernd (the Icelandic Heart Association), and the Althingi (the Icelandic Parliament). The study is approved by the Icelandic National Bioethics Committee, VSN: 00-063. The researchers are indebted to the participants for their willingness to participate in the study                                                                                                                                                                                                                                                                                                                                              |
| Amish studies [2,3]         | Population-based founder cohort | 1,264                        | None                                   | Age<20, severe chronic disease, call rate<95%, pHWE<10E-6                                                                                                           | Modified kinetic Jaffé reaction                                                                                                                                                                                                                                                        | All had baseline measures. Timing for repeat measures was variable                                                                                                  | AMISH: The Amish studies are supported by grants and contracts from the NIH including R01 AG18728 (Amish Longevity Study), R01 HL088119 (Amish Calcification Study), U01 GM074518-04 (PAPI Study), U01 HL072515-06 (HAPI Study), U01 HL084756 and NIH K12RR023250 (University of Maryland MCRDP), NIH P30 DK072488 (Clinical Nutrition Research Unit), the University of Maryland General Clinical Research Center, grant M01 RR 16500 and the Baltimore Veterans Administration Medical Center Geriatrics Research and Education Clinical Center. We thank our Amish research volunteers for their long-standing partnership in research, and the research staff at the Amish Research Clinic for their hard work and dedication. |

|                                                      |                                  |                            |                                                                                                                                                                                                                                                                              |                                                                                                                                                                                                                                                                                                                                                                        |                                                           |                                                                                                                                                                                                                   |                                                                                                                                                                                                                                                                                                                                                                                                                                                                                                                                                                                                                                                                                                                                                                                                                                                                                          |
|------------------------------------------------------|----------------------------------|----------------------------|------------------------------------------------------------------------------------------------------------------------------------------------------------------------------------------------------------------------------------------------------------------------------|------------------------------------------------------------------------------------------------------------------------------------------------------------------------------------------------------------------------------------------------------------------------------------------------------------------------------------------------------------------------|-----------------------------------------------------------|-------------------------------------------------------------------------------------------------------------------------------------------------------------------------------------------------------------------|------------------------------------------------------------------------------------------------------------------------------------------------------------------------------------------------------------------------------------------------------------------------------------------------------------------------------------------------------------------------------------------------------------------------------------------------------------------------------------------------------------------------------------------------------------------------------------------------------------------------------------------------------------------------------------------------------------------------------------------------------------------------------------------------------------------------------------------------------------------------------------------|
| Atherosclerosis Risk in Communities (ARIC) Study [4] | Population-based                 | 9,713 of European ancestry | None                                                                                                                                                                                                                                                                         | Of the 9713 genotyped individuals of European ancestry, we excluded 658 individuals based on discrepancies with previous genotypes, disagreement between reported and genotypic sex, one randomly selected member of a pair of first-degree relatives, or outlier based on measures of average DST or more than 8 SD away on any of the first 10 principal components. | Modified kinetic Jaffe reaction (serum)                   | Serum creatinine from visits 1, 2, and 4 were used for phenotype definition                                                                                                                                       | The Atherosclerosis Risk in Communities Study is carried out as a collaborative study supported by National Heart, Lung, and Blood Institute contracts (HHSN268201100005C, HHSN268201100006C, HHSN268201100007C, HHSN268201100008C, HHSN268201100009C, HHSN268201100010C, HHSN268201100011C, and HHSN268201100012C), R01HL087641, R01HL59367 and R01HL086694; National Human Genome Research Institute contract U01HG004402; and National Institutes of Health contract HHSN268200625226C. The authors thank the staff and participants of the ARIC study for their important contributions. Infrastructure was partly supported by Grant Number UL1RR025005, a component of the National Institutes of Health and NIH Roadmap for Medical Research. A.K. was supported by the grant KO3598/2-1 (Emmy Noether Programme) of the German Research Foundation.                              |
| ASPS [5,6]                                           | Prospective, single center study | 922                        | History of neuropsychiatric disease, previous stroke and/or TIA, and dementia                                                                                                                                                                                                | Of the 922 participants who underwent genotyping, 74 with sample call rate < 98% were excluded resulting in a total of 848 genotyped individuals                                                                                                                                                                                                                       | Modified kinetic Jaffe reaction                           | Serum creatinine was measured at baseline and at the 3 year and 6 year follow-up.                                                                                                                                 | ASPS: The research reported in this article was funded by the Austrian Science Fond (FWF) grant number P20545-P05 and P13180. The Medical University of Graz supports the databank of the ASPS. The authors thank the staff and the participants of the ASPS for their valuable contributions. We thank Birgit Reinhart for her long-term administrative commitment and Ing Johann Semmler for the technical assistance at creating the DNA-bank.                                                                                                                                                                                                                                                                                                                                                                                                                                        |
| Cardiovascular Health Study (CHS) [7,8]              | Prospective, population-based    | 3,397                      | In total, 1908 persons were excluded from the GWAS study sample due to the presence at study baseline of coronary heart disease, congestive heart failure, peripheral vascular disease, valvular heart disease, stroke or transient ischemic attack or lack of available DNA | This study is based upon genotyping results from 3,329 CHS Caucasian participants, who were free of clinical cardiovascular disease at baseline, consented to genetic testing, and had DNA available for genotyping. Genotypes were called using the Illumina BeadStudio software. Genotyping was successful in 3,291 persons.                                         | Colorimetric method (Ektachem 700, Eastman Kodak) (serum) | The serum creatinine at baseline and at the 5 year follow-up were used to define the longitudinal renal phenotypes. If data from the 5 year follow-up were missing, the data from the 9 year follow-up were used. | The CHS research reported in this article was supported by contract numbers N01-HC-85079 through N01-HC-85086, N01-HC-35129, N01 HC-15103, N01 HC-55222, N01-HC-75150, N01-HC-45133, grant numbers U01 HL080295 and R01 HL087652 from the National Heart, Lung, and Blood Institute, with additional contribution from the National Institute of Neurological Disorders and Stroke. A full list of principal CHS investigators and institutions can be found at <a href="http://www.chs-nhlbi.org/pi.htm">http://www.chs-nhlbi.org/pi.htm</a> . DNA handling and genotyping was supported in part by National Center for Research Resources grant M01RR00425 to the Cedars-Sinai General Clinical Research Center Genotyping core and National Institute of Diabetes and Digestive and Kidney Diseases grant DK063491 to the Southern California Diabetes Endocrinology Research Center. |

|                                        |                                      |       |                                              |                                                                                                   |                                                                                                                                                        |                                                                                                                                                                                                                                                                                                                                                                                                                                                          |                                                                                                                                                                                                                                                                                                               |
|----------------------------------------|--------------------------------------|-------|----------------------------------------------|---------------------------------------------------------------------------------------------------|--------------------------------------------------------------------------------------------------------------------------------------------------------|----------------------------------------------------------------------------------------------------------------------------------------------------------------------------------------------------------------------------------------------------------------------------------------------------------------------------------------------------------------------------------------------------------------------------------------------------------|---------------------------------------------------------------------------------------------------------------------------------------------------------------------------------------------------------------------------------------------------------------------------------------------------------------|
| Cohorte<br>Lausannoise<br>(CoLauS) [9] | Prospective,<br>population-<br>based | 5,636 | Individuals <35<br>years were no<br>included | Call rate <90%,<br>related individuals,<br>resulting in 5435<br>genotyped individuals<br>in total | Modified kinetic<br>Jaffe reaction<br>(maximum inter<br>and intra-batch<br>CVs: 2.9% –<br>0.7%) (Roche<br>Diagnostics,<br>Switzerland) in<br>the serum | Participants<br>who took part<br>at the baseline<br>CoLauS<br>examination<br>were invited to<br>a 5-year follow-<br>up<br>examination;<br>which is still<br>ongoing and<br>covers the<br>period 2009 to<br>2012. 1931<br>COLAUS<br>participants<br>had data<br>available at the<br>time of the<br>stage 1<br>discovery; and<br>2238 additional<br>COLAUS<br>participants<br>had data<br>available to be<br>included at the<br>time of the<br>replication | The CoLauS study received financial contributions<br>from GlaxoSmithKline; the Faculty of Biology and<br>Medicine of Lausanne; the Swiss National Science<br>Foundation (33CSCO-122661; 3200BO-111361/2;<br>3100AO-116323/1;310000-112552). M.B is<br>supported by the Swiss School of Public Health<br>Plus. |
|----------------------------------------|--------------------------------------|-------|----------------------------------------------|---------------------------------------------------------------------------------------------------|--------------------------------------------------------------------------------------------------------------------------------------------------------|----------------------------------------------------------------------------------------------------------------------------------------------------------------------------------------------------------------------------------------------------------------------------------------------------------------------------------------------------------------------------------------------------------------------------------------------------------|---------------------------------------------------------------------------------------------------------------------------------------------------------------------------------------------------------------------------------------------------------------------------------------------------------------|

|                                             |                                  |              |             |                                                                                                                                                                                                                                                                                |                                                |                                                                                                                                                                                                                                                                                                                                                                                                                                                                                                                                                                                                                                                                                                                                                                |                                                                                                                                                                                                                                                                                                                                                                                                                                                                                                                                                                                                                                                                                                                                                                                                                                                                                                   |
|---------------------------------------------|----------------------------------|--------------|-------------|--------------------------------------------------------------------------------------------------------------------------------------------------------------------------------------------------------------------------------------------------------------------------------|------------------------------------------------|----------------------------------------------------------------------------------------------------------------------------------------------------------------------------------------------------------------------------------------------------------------------------------------------------------------------------------------------------------------------------------------------------------------------------------------------------------------------------------------------------------------------------------------------------------------------------------------------------------------------------------------------------------------------------------------------------------------------------------------------------------------|---------------------------------------------------------------------------------------------------------------------------------------------------------------------------------------------------------------------------------------------------------------------------------------------------------------------------------------------------------------------------------------------------------------------------------------------------------------------------------------------------------------------------------------------------------------------------------------------------------------------------------------------------------------------------------------------------------------------------------------------------------------------------------------------------------------------------------------------------------------------------------------------------|
| <p>Framingham Heart Study (FHS) [10-12]</p> | <p>Prospective, family-based</p> | <p>9,300</p> | <p>None</p> | <p>Of the 9,274 participants who underwent genotyping, we made the following exclusions: sample call rate &lt;97% (n=666), genotype heterozygosity &gt; 5 standard deviations, and ambiguous family data (n=127). This resulted in a total of 8,481 genotyped individuals.</p> | <p>Modified kinetic Jaffe reaction (serum)</p> | <p>Participants for the current study include individuals of European descent from the original cohort who attended cohort exam 15 (1977 to 1979) and exam 24 (1995 to 1998) [n=548], as well as participants from the offspring cohort who attended the sixth (1995 – 1998) and the eighth exams (2005-2008) [n=2234]. Incident CKD was defined as cases of CKD (eGFR &lt;60 ml/min/1.73m<sup>2</sup>) present at exam cycle 24 (original cohort) and exam cycle 8 (offspring cohort) in individuals free of CKD at the earlier respective exam (i.e. exam 15 for the original cohort and exam 6 for the offspring cohort). In total 2523 participants had complete baseline and follow-up information, and were successfully genotyped for GWA analysis.</p> | <p>FHS: This research was conducted in part using data and resources from the Framingham Heart Study of the National Heart Lung and Blood Institute of the National Institutes of Health and Boston University School of Medicine. The analyses reflect intellectual input and resource development from the Framingham Heart Study investigators participating in the SNP Health Association Resource (SHARe) project. This work was partially supported by the National Heart, Lung and Blood Institute's Framingham Heart Study (Contract No. N01-HC-25195) and its contract with Affymetrix, Inc for genotyping services (Contract No. N02-HL-6-4278). A portion of this research utilized the Linux Cluster for Genetic Analysis (LinGA-II) funded by the Robert Dawson Evans Endowment of the Department of Medicine at Boston University School of Medicine and Boston Medical Center.</p> |
|---------------------------------------------|----------------------------------|--------------|-------------|--------------------------------------------------------------------------------------------------------------------------------------------------------------------------------------------------------------------------------------------------------------------------------|------------------------------------------------|----------------------------------------------------------------------------------------------------------------------------------------------------------------------------------------------------------------------------------------------------------------------------------------------------------------------------------------------------------------------------------------------------------------------------------------------------------------------------------------------------------------------------------------------------------------------------------------------------------------------------------------------------------------------------------------------------------------------------------------------------------------|---------------------------------------------------------------------------------------------------------------------------------------------------------------------------------------------------------------------------------------------------------------------------------------------------------------------------------------------------------------------------------------------------------------------------------------------------------------------------------------------------------------------------------------------------------------------------------------------------------------------------------------------------------------------------------------------------------------------------------------------------------------------------------------------------------------------------------------------------------------------------------------------------|

|                 |                          |       |                             |                                                                                                                                                                                                                                                                                                                                                                                                                                                                                                                                                                                                                    |                                                                                                                                                                                                                                                                                                           |                                                                                    |                                                                                                                                                                                                                                                                                                                                                                                                                                                                                                                                                                                                                                                                                                  |
|-----------------|--------------------------|-------|-----------------------------|--------------------------------------------------------------------------------------------------------------------------------------------------------------------------------------------------------------------------------------------------------------------------------------------------------------------------------------------------------------------------------------------------------------------------------------------------------------------------------------------------------------------------------------------------------------------------------------------------------------------|-----------------------------------------------------------------------------------------------------------------------------------------------------------------------------------------------------------------------------------------------------------------------------------------------------------|------------------------------------------------------------------------------------|--------------------------------------------------------------------------------------------------------------------------------------------------------------------------------------------------------------------------------------------------------------------------------------------------------------------------------------------------------------------------------------------------------------------------------------------------------------------------------------------------------------------------------------------------------------------------------------------------------------------------------------------------------------------------------------------------|
| GENOA [13-15]   | Family-based             | 1,553 | 5 Non-white, 1 Missing Exam | <p>For the Affymetrix 6.0 data, we excluded: 25 subjects who failed pre-processing, 123 with Contrast QC &lt; 0.4, 2 for inconsistent relatedness, 11 identical twins. We re-ran the samples that failed pre-processing or the Contrast QC filter on the Affymetrix 6.0 data along with 50 that had passed. Of these samples, 19 failed genotyping completely, 9 had call rate &lt; 0.95, 2 had inconsistent relatedness, and 2 were identical twins. Of these 1509 remaining samples, 346 samples do not have serum creatinine information. Our final data had 1163 samples with genotype and phenotype data.</p> | <p>We performed a calibration study between serum creatinine levels in the 1st GENOA examination (1996-2000) assayed on a Monarch autoanalyzer (uncompensated rate-Jaffe reaction) and in the 2nd and 3rd GENOA examinations assayed on a Hitachi 911 autoanalyzer (compensated rate-Jaffe reaction).</p> | <p>Serum creatinine was measured at baseline, at 5 year and 10 year follow-up.</p> | <p>GENOA: This research was partially supported by the National Heart Lung and Blood Institute of the National Institutes of Health R01 HL-87660.</p>                                                                                                                                                                                                                                                                                                                                                                                                                                                                                                                                            |
| Health ABC [16] | Prospective cohort study | 888   | None                        | <p>Samples were excluded from the dataset for the reasons of sample failure, genotypic sex mismatch, and first-degree relative of an included individual based on genotype data.</p>                                                                                                                                                                                                                                                                                                                                                                                                                               | <p>Colorimetric technique on a Johnson &amp; Johnson VITROS 950 Chemistry Analyzer (Johnson &amp; Johnson, New Brunswick, NJ, USA) using the enzymatic method.</p>                                                                                                                                        | <p>Serum creatinine was measured at year1 and year 10 .</p>                        | <p>The Health Aging and Body Composition Study (Health ABC) was funded by the National Institutes of Aging. This research was supported by NIA contracts N01AG62101, N01AG62103, and N01AG62106. The genome-wide association study was funded by NIA grant 1R01AG032098-01A1 to Wake Forest University Health Sciences and genotyping services were provided by the Center for Inherited Disease Research (CIDR). CIDR is fully funded through a federal contract from the National Institutes of Health to The Johns Hopkins University, contract number HHSN268200782096C. This research was supported in part by the Intramural Research Program of the NIH, National Institute on Aging.</p> |

|              |                |        |      |                                                                                                                                                                                                                                     |                                                                                                                                                                                                                                                                                            |                                                                                                                                          |                                                                    |
|--------------|----------------|--------|------|-------------------------------------------------------------------------------------------------------------------------------------------------------------------------------------------------------------------------------------|--------------------------------------------------------------------------------------------------------------------------------------------------------------------------------------------------------------------------------------------------------------------------------------------|------------------------------------------------------------------------------------------------------------------------------------------|--------------------------------------------------------------------|
| JUPITER [17] | Clinical trial | 12,649 | None | Successfully genotyped samples had >98.5% of SNPs genotyped. In JUPITER, the total number genotyped samples was 12,649 among which 8,782 had self-reported European ancestry that could be confirmed by the MDS procedure in PLINK. | Creatinine analyses were performed in JUPITER core central laboratories using the Roche Modular Analytics Chemistry System with Roche creatinine reagents (modified Jaffé reaction with rate blanking). Intra- and inter-assay coefficients of variation were 4.1% and 3.9%, respectively. | The phenotypes were calculated using two creatinines per patient, taken at the first and last exam of each patient in the Jupiter study. | The JUPITER trial and the genotyping were supported by AstraZeneca |
|--------------|----------------|--------|------|-------------------------------------------------------------------------------------------------------------------------------------------------------------------------------------------------------------------------------------|--------------------------------------------------------------------------------------------------------------------------------------------------------------------------------------------------------------------------------------------------------------------------------------------|------------------------------------------------------------------------------------------------------------------------------------------|--------------------------------------------------------------------|

|                                     |                                     |                      |                                                   |                                       |                                                                                                                   |                                                                                                                |                                                                                                                                                                                                                                                                                                                                                                                                                                                                                                                                                                                                                                                                                                                                                                                                                                                                                                                                                                                                                                                                                                                                                                                                                                                                                                                                                                                                                                                                                |
|-------------------------------------|-------------------------------------|----------------------|---------------------------------------------------|---------------------------------------|-------------------------------------------------------------------------------------------------------------------|----------------------------------------------------------------------------------------------------------------|--------------------------------------------------------------------------------------------------------------------------------------------------------------------------------------------------------------------------------------------------------------------------------------------------------------------------------------------------------------------------------------------------------------------------------------------------------------------------------------------------------------------------------------------------------------------------------------------------------------------------------------------------------------------------------------------------------------------------------------------------------------------------------------------------------------------------------------------------------------------------------------------------------------------------------------------------------------------------------------------------------------------------------------------------------------------------------------------------------------------------------------------------------------------------------------------------------------------------------------------------------------------------------------------------------------------------------------------------------------------------------------------------------------------------------------------------------------------------------|
| KORA S3/F3<br>KORA S4/F4<br>[18,19] | Prospective<br>population-<br>based | F3: 1644<br>F4: 1814 | None                                              | None                                  | S3 and S4:<br>enzymatic<br>assay.<br>F3 and F4:<br>Modified kinetic<br>Jaffe reaction                             | Serum<br>creatinine was<br>measured at<br>baseline and at<br>the 10 year<br>(F3) and 7 year<br>(F4) follow-up. | KORA studies: The genetic epidemiological work was funded by the NIH subcontract from the Children's Hospital, Boston, US, (H.E.W., I.M.H, prime grant 1 R01 DK075787-01A1), the German National Genome Research Net NGFN2 and NGFNplus (H.E.W. 01GS0823; WK project A3, number 01GS0834), the Munich Center of Health Sciences (MC Health) as part of LMUinnovativ, and by the Else Kröner-Fresenius-Stiftung (P48/08//A11/08 to C.A.B. and B.K.K.; 2012_A147 to CAB and IMH). The kidney parameter measurements in F3 were funded by the Else Kröner-Fresenius-Stiftung (C.A.B., B.K.K.) and the Regensburg University Medical Center, Germany; in F4 by the University of Ulm, Germany (W.K.). Genome wide genotyping costs in F3 and F4 were in part funded by the Else Kröner-Fresenius-Stiftung (C.A.B., B.K.K.). De novo genotyping in F3 and F4 were funded by the Else Kröner-Fresenius-Stiftung (C.A.B., IMH). The KORA research platform and the MONICA Augsburg studies were initiated and financed by the Helmholtz Zentrum München, German Research Center for Environmental Health, by the German Federal Ministry of Education and Research and by the State of Bavaria. Geno-typing was performed in the Genome Analysis Center (GAC) of the Helmholtz Zentrum München. The LINUX platform for computation was funded by the University of Regensburg for the Department of Epidemiology and Preventive Medicine at the Regensburg University Medical Center. |
| MESA [20]                           | Prospective<br>population-<br>based | 5955                 | Baseline<br>cardiovascular<br>disease<br>excluded | Baseline<br>cardiovascular<br>disease | Serum<br>creatinine<br>measured at<br>baseline and at<br>EXAMS 3, 4<br>and 5 ; exams<br>around 1.5<br>years apart | Vitros analyzer<br>(Johnson and<br>Johnson) with<br>creatinine<br>aminohydrolysis<br>method                    | MESA and the MESA SHARe project are conducted and supported by the National Heart, Lung and Blood Institute (NHLBI) in collaboration with MESA Investigators. Support for MESA is provided by contracts N01-HC-95159, N01-HC-95160, N01-HC-95161, N01-HC-95162, N01-HC-95163, N01-HC-95164, N01-HC-95165, N01-HC-95166, N01-HC-95167, N01-HC-95168, N01-HC-95169 and CTSA UL1-RR-024156                                                                                                                                                                                                                                                                                                                                                                                                                                                                                                                                                                                                                                                                                                                                                                                                                                                                                                                                                                                                                                                                                        |



|                                                 |                                |             |      |                                                                                                                                                                                                                                                                                                                                      |                                                                      |                                                                                |                                                                                                                                                                                                                                                                                                                                                                                                                                                                                                                                                                                                                                                                                                                                                                                                                                                                                                                                                                                                                                                                                                                                                                                                                                                                                                                                                                                                                                                                                                                                                             |
|-------------------------------------------------|--------------------------------|-------------|------|--------------------------------------------------------------------------------------------------------------------------------------------------------------------------------------------------------------------------------------------------------------------------------------------------------------------------------------|----------------------------------------------------------------------|--------------------------------------------------------------------------------|-------------------------------------------------------------------------------------------------------------------------------------------------------------------------------------------------------------------------------------------------------------------------------------------------------------------------------------------------------------------------------------------------------------------------------------------------------------------------------------------------------------------------------------------------------------------------------------------------------------------------------------------------------------------------------------------------------------------------------------------------------------------------------------------------------------------------------------------------------------------------------------------------------------------------------------------------------------------------------------------------------------------------------------------------------------------------------------------------------------------------------------------------------------------------------------------------------------------------------------------------------------------------------------------------------------------------------------------------------------------------------------------------------------------------------------------------------------------------------------------------------------------------------------------------------------|
| The Rotterdam Study-I [21-23]                   | Prospective, population-based. | RS-I: 5,974 | None | Any samples with a call rate <97.5%, excess autosomal heterozygosity >0.336 (~FDR <0.1%), mismatch between called and phenotypic gender, or if there were outliers identified by the IBS clustering analysis (see below) with >3 standard deviations from population mean or IBS probabilities >97% were excluded from the analysis. | Baseline and third periodical visit: modified kinetic Jaffe reaction | Creatinine levels were measured at baseline and at the third periodical visit. | Rotterdam Study 1: The GWA study was funded by the Netherlands Organisation of Scientific Research NWO Investments (nr. 175.010.2005.011, 911-03-012), the Research Institute for Diseases in the Elderly (014-93-015; RIDE2), the Netherlands Genomics Initiative (NGI)/Netherlands Consortium for Healthy Aging (NCHA) project nr. 050-060-810. We thank Pascal Arp, Mila Jhamai, Dr Michael Moorhouse, Marijn Verkerk, and Sander Bervoets for their help in creating the GWAS database. The Rotterdam Study is funded by Erasmus Medical Center and Erasmus University, Rotterdam, Netherlands Organization for the Health Research and Development (ZonMw), the Research Institute for Diseases in the Elderly (RIDE), the Ministry of Education, Culture and Science, the Ministry for Health, Welfare and Sports, the European Commission (DG XII), and the Municipality of Rotterdam. The authors are very grateful to the participants and staff from the Rotterdam Study, the participating general practitioners and the pharmacists. We would like to thank Dr. Tobias A. Knoch, Luc V. de Zeeuw, Anis Abuseiris, and Rob de Graaf as well as their institutions the Erasmus Computing Grid, Rotterdam, The Netherlands, and especially the national German MediGRID and Services@MediGRID part of the German D-Grid, both funded by the German Bundes-ministerium für Forschung und Technology under grants #01 AK 803 A-H and #01 IG 07015 G, for access to their grid resources. Abbas Dehghan is supported by NWO grant (vici, 918-76-619). |
| The Study of Health in Pomerania (SHIP) [24,25] | Prospective population-based   | 4,105       | None | The following samples were excluded: Affymetrix QC call rate <86%, sample call rate <92%, duplicate samples (by IBD estimation), individuals with reported/genotyped gender mismatch.                                                                                                                                                | Jaffé method at both visits                                          | Serum creatinine was measured at baseline and at the first follow-up visit.    | SHIP is part of the Community Medicine Research net of the University of Greifswald, Germany, which is funded by the Federal Ministry of Education and Research (grants no. 01ZZ9603, 01ZZ0103, and 01ZZ0403), the Ministry of Cultural Affairs as well as the Social Ministry of the Federal State of Mecklenburg-West Pomerania. Genome-wide data have been supported by the Federal Ministry of Education and Research (grant no. 03ZIK012) and a joint grant from Siemens Healthcare, Erlangen, Germany and the Federal State of Mecklenburg-West Pomerania. The University of Greifswald is a member of the 'Center of Knowledge Interchange' program of the Siemens AG.                                                                                                                                                                                                                                                                                                                                                                                                                                                                                                                                                                                                                                                                                                                                                                                                                                                                               |

|                           |                              |      |      |                                                                                                                                                                                                                                                                                                                                                                                                                                                                                                                                                                                                                                                                                                                                                                |                                                                                                                                                                                                                                                                                                                                                                                                                           |                                                                             |                                                                                                                                                                                                                                                                                                                                                                                                                                                                                                                                                                                                                                                                                                                                                                                                                                                                                                                                                                                                                                                                                                                                                                                               |
|---------------------------|------------------------------|------|------|----------------------------------------------------------------------------------------------------------------------------------------------------------------------------------------------------------------------------------------------------------------------------------------------------------------------------------------------------------------------------------------------------------------------------------------------------------------------------------------------------------------------------------------------------------------------------------------------------------------------------------------------------------------------------------------------------------------------------------------------------------------|---------------------------------------------------------------------------------------------------------------------------------------------------------------------------------------------------------------------------------------------------------------------------------------------------------------------------------------------------------------------------------------------------------------------------|-----------------------------------------------------------------------------|-----------------------------------------------------------------------------------------------------------------------------------------------------------------------------------------------------------------------------------------------------------------------------------------------------------------------------------------------------------------------------------------------------------------------------------------------------------------------------------------------------------------------------------------------------------------------------------------------------------------------------------------------------------------------------------------------------------------------------------------------------------------------------------------------------------------------------------------------------------------------------------------------------------------------------------------------------------------------------------------------------------------------------------------------------------------------------------------------------------------------------------------------------------------------------------------------|
| Three Cities (3C) [26,27] | Prospective population-based | 6748 | None | <p>DNA samples were transferred to the French Centre National de Génotypage (CNG) for genotyping. First stage samples that passed DNA quality control were genotyped with Illumina Human 610-Quad BeadChips. Genotype data were retained in the study for samples that had been successfully genotyped for &gt;98% of the SNP markers. SNPs with call rate &lt;98%, minor allele frequency &lt;1% or exhibiting departure from the Hardy-Weinberg equilibrium in the 3C population (<math>p &lt; 10^{-6}</math>) were excluded. We also removed 308 samples because they were found to be 1st or 2nd-degree relatives of other study participants or were assessed non-European descent based on genetic analysis. This led us to retain 6440 individuals.</p> | <p>Jaffe assay was used to measure creatinine in all participants at baseline and at the 4-yr follow-up. In order to obtain isotope dilution mass spectrometry (IDMS) traceable creatinine, we used baseline and follow-up frozen serum samples from 20% of the participants to remeasure creatinine with an IDMS traceable enzymatic assay and developed equations relating the Jaffe and IDMS-traceable creatinine.</p> | <p>Serum creatinine was measured at baseline and at the 4-yr follow-up.</p> | <p>Three Cities: The work was made possible by the generous participation of the control subjects, the patients, and their families. We thank Dr. Anne Boland (CNG) for her technical help in preparing the DNA samples for analyses. This work was supported by the National Foundation for Alzheimer's disease and related disorders, the Institut Pasteur de Lille and the Centre National de Génotypage. The Three-City Study was performed as part of a collaboration between the Institut National de la Santé et de la Recherche Médicale (Inserm), the Victor Segalen Bordeaux II University and Sanofi-Synthélabo. The Fondation pour la Recherche Médicale funded the preparation and initiation of the study. The 3C Study was also funded by the Caisse Nationale Maladie des Travailleurs Salariés, Direction Générale de la Santé, MGEN, Institut de la Longévité, Agence Française de Sécurité Sanitaire des Produits de Santé, the Aquitaine and Bourgogne Regional Councils, Fondation de France and the joint French Ministry of Research/INSERM "Cohortes et collections de données biologiques" programme. Lille Génopôle received an unconditional grant from Eisai.</p> |
| Stage 2 cohorts           |                              |      |      |                                                                                                                                                                                                                                                                                                                                                                                                                                                                                                                                                                                                                                                                                                                                                                |                                                                                                                                                                                                                                                                                                                                                                                                                           |                                                                             |                                                                                                                                                                                                                                                                                                                                                                                                                                                                                                                                                                                                                                                                                                                                                                                                                                                                                                                                                                                                                                                                                                                                                                                               |

|                                       |                                                                               |                       |                                          |                                                                       |                                                                                                                                                                                                                                                                                                                                                                                                                |                                                                                                |                                                                                                                                                                                                                                                                                                                                                                                                                                                                                                                                                                                                                                                                                                                                                       |
|---------------------------------------|-------------------------------------------------------------------------------|-----------------------|------------------------------------------|-----------------------------------------------------------------------|----------------------------------------------------------------------------------------------------------------------------------------------------------------------------------------------------------------------------------------------------------------------------------------------------------------------------------------------------------------------------------------------------------------|------------------------------------------------------------------------------------------------|-------------------------------------------------------------------------------------------------------------------------------------------------------------------------------------------------------------------------------------------------------------------------------------------------------------------------------------------------------------------------------------------------------------------------------------------------------------------------------------------------------------------------------------------------------------------------------------------------------------------------------------------------------------------------------------------------------------------------------------------------------|
| ADVANCE<br>[28,29]                    | randomised controlled trial done by 215 collaborating centres in 20 countries | 2301                  | All patients are T2D of Caucasian origin | None                                                                  | Nationally approved standardized tests performed at each of the participating Centers in all countries                                                                                                                                                                                                                                                                                                         | Serum creatinine was measured at baseline and at the end of the study which was 5 years later. | ADVANCE: The genetic epidemiological work was funded by Prognomix Inc. and by grants from Genome Quebec and Canadian Institutes for Health Research (CIHR). The clinical study was managed by the George Institute for International Health (Sydney, Australia) with grants received from Les Laboratoires Servier, France and from Medical Research Council of Australia. The genotyping was performed at the genomic platform of CRCHUM. The authors acknowledge the technical help of Carole Long and Mounif Haloui and the bioinformatic analyses performed by Gilles Godefroid, François-Christophe Blanchet-Marois and François Harvey. The members of the genetic sub-study of ADVANCE, Stephen Harrap and Michel Marre are also acknowledged. |
| Blue Mountains Eye Study BMES [30-32] | Prospective cohort study                                                      | 2,761 (2534 after QC) | None                                     | Subjects with missing phenotype data or whose genotype data failed QC | Baseline Serum creatinine was measured using the Roche Jaffe assay; at the 10-year follow-up visit, it was assessed using Isotope Dilution Mass Spectrometry (IDMS). The CKD Gene analysis protocol (Incident CKD and Rapid Decline Analysis Plan November 25, 2011) was followed to calibrate/convert creatinine measures at baseline to be in alignment with the measures in the 10-year visit (using IDMS). | Baseline and the 10-year follow-up visits                                                      | The Blue Mountains Eye Study (BMES) was supported by the Australian National Health & Medical Research Council (NHMRC), Canberra Australia (NHMRC project grant IDs 974159, 211069, 302068, and Centre for Clinical Research Excellence in Translational Clinical Research in Eye Diseases, CCRE in TCR-Eye, grant ID 529923). The BMES GWAS and genotyping costs was supported by Australian NHMRC, Canberra Australia (NHMRC project grant IDs 512423, 475604 and 529912), and the Wellcome Trust, UK as part of Wellcome Trust Case Control Consortium 2 (A Viswanathan, P McGuffin, P Mitchell, F Topouzis, P Foster, grant IDs 085475/B/08/Z and 085475/08/Z). EGH is supported by the NHMRC Fellowship scheme.                                  |

|                               |                                               |      |      |                                                                            |                                                             |                                                                                                                                                                |                                                                                                                                                                                                                                                                                                                                                                 |
|-------------------------------|-----------------------------------------------|------|------|----------------------------------------------------------------------------|-------------------------------------------------------------|----------------------------------------------------------------------------------------------------------------------------------------------------------------|-----------------------------------------------------------------------------------------------------------------------------------------------------------------------------------------------------------------------------------------------------------------------------------------------------------------------------------------------------------------|
| Cohorte Lausannoise (CoLauS)  | See "stage 1 cohorts" above                   |      |      |                                                                            |                                                             |                                                                                                                                                                |                                                                                                                                                                                                                                                                                                                                                                 |
| HYPERGENES [33]               | case-control and prospective population based | 651  | none | none                                                                       | Serum creatinine was measured using kinetic Jaffe reaction  | The samples extracted from the HYPERGENES cohort with complete baseline and follow-up (mean 5.6 years) information were used for this analysis (651 subjects). | HYPERGENES (FP7 - HEALTH-F4-2007-201550); INTEROMICS (MIUR - CNR Italian Flagship Project); IC15-CT98-0329-EPOGH; LSHM-CT-2006-037093; HEALTH-2011-278249-EU-MASCARA; and ERC Advanced Grant-2011-294713-EPLORE and the Fonds voor Wetenschappelijk Onderzoek Vlaanderen; Ministry of the Flemish Community; Brussels; Belgium (grants G.0575.06 and G.0734.09) |
| KORA S3/F3 (non-GWAS) [18,19] | Prospective, population-based                 | 1498 | none | Individuals not genotyped genome-wide as described under "stage 1 cohorts" | S3: enzymatic assay.<br>F3: Modified kinetic Jaffe reaction | Serum creatinine was measured at baseline and at the 10 year (F3) follow-up.                                                                                   | KORA studies: The genetic epidemiological work was funded by the NIH subcontract from the Children's Hospital, Boston, US, (H.E.W., I.M.H, prime grant 1 R01 DK075787-01A1), the German National Genome Research Net NGFN2 and NGFNplus (H.E.W. 01GS0823; WK project A3,                                                                                        |

|                                              |                                               |             |             |                                                                                                   |                                                                                 |                                                                                                        |                                                                                                                                                                                                                                                                                                                                                                                                                                                                                                                                                                                                                                                                                                                                                                                                                                                                                                                                                                                                                                                                                                                                                                                                              |
|----------------------------------------------|-----------------------------------------------|-------------|-------------|---------------------------------------------------------------------------------------------------|---------------------------------------------------------------------------------|--------------------------------------------------------------------------------------------------------|--------------------------------------------------------------------------------------------------------------------------------------------------------------------------------------------------------------------------------------------------------------------------------------------------------------------------------------------------------------------------------------------------------------------------------------------------------------------------------------------------------------------------------------------------------------------------------------------------------------------------------------------------------------------------------------------------------------------------------------------------------------------------------------------------------------------------------------------------------------------------------------------------------------------------------------------------------------------------------------------------------------------------------------------------------------------------------------------------------------------------------------------------------------------------------------------------------------|
| <p>KORA S4/F4<br/>(non-GWAS)<br/>[18,19]</p> | <p>Prospective,<br/>population-<br/>based</p> | <p>1202</p> | <p>none</p> | <p>Individuals not<br/>genotyped<br/>genome-wide as<br/>described under<br/>“stage 1 cohorts”</p> | <p>S4: enzymatic<br/>assay.<br/>F5: Modified<br/>kinetic Jaffe<br/>reaction</p> | <p>Serum<br/>creatinine was<br/>measured at<br/>baseline and at<br/>the 7 year (F4)<br/>follow-up.</p> | <p>number 01GS0834), the Munich Center of Health Sciences (MC Health) as part of LMUinnovativ, and by the Else Kröner-Fresenius-Stiftung (P48/08//A11/08 to C.A.B. and B.K.K.; 2012_A147 to CAB and IMH). The kidney parameter measurements in F3 were funded by the Else Kröner-Fresenius-Stiftung (C.A.B., B.K.K.) and the Regensburg University Medical Center, Germany; in F4 by the University of Ulm, Germany (W.K.). Genome wide genotyping costs in F3 and F4 were in part funded by the Else Kröner-Fresenius-Stiftung (C.A.B., B.K.K.). De novo genotyping in F3 and F4 were funded by the Else Kröner-Fresenius-Stiftung (C.A.B., IMH). The KORA research platform and the MONICA Augsburg studies were initiated and financed by the Helmholtz Zentrum München, German Research Center for Environmental Health, by the German Federal Ministry of Education and Research and by the State of Bavaria. Geno-typing was performed in the Genome Analysis Center (GAC) of the Helmholtz Zentrum München. The LINUX platform for computation was funded by the University of Regensburg for the Department of Epidemiology and Preventive Medicine at the Regensburg University Medical Center.</p> |
|----------------------------------------------|-----------------------------------------------|-------------|-------------|---------------------------------------------------------------------------------------------------|---------------------------------------------------------------------------------|--------------------------------------------------------------------------------------------------------|--------------------------------------------------------------------------------------------------------------------------------------------------------------------------------------------------------------------------------------------------------------------------------------------------------------------------------------------------------------------------------------------------------------------------------------------------------------------------------------------------------------------------------------------------------------------------------------------------------------------------------------------------------------------------------------------------------------------------------------------------------------------------------------------------------------------------------------------------------------------------------------------------------------------------------------------------------------------------------------------------------------------------------------------------------------------------------------------------------------------------------------------------------------------------------------------------------------|

|                                 |                                                                       |      |                                                                           |                        |                                                                                                  |                                                                                                                                             |                                                                                                                                                                                                                                                                                                                                                                                                                                                                                                                                                                                                                                                                                                                                                                                                                                                                                                                                                                                                                                                                                                                                                                                                                                    |
|---------------------------------|-----------------------------------------------------------------------|------|---------------------------------------------------------------------------|------------------------|--------------------------------------------------------------------------------------------------|---------------------------------------------------------------------------------------------------------------------------------------------|------------------------------------------------------------------------------------------------------------------------------------------------------------------------------------------------------------------------------------------------------------------------------------------------------------------------------------------------------------------------------------------------------------------------------------------------------------------------------------------------------------------------------------------------------------------------------------------------------------------------------------------------------------------------------------------------------------------------------------------------------------------------------------------------------------------------------------------------------------------------------------------------------------------------------------------------------------------------------------------------------------------------------------------------------------------------------------------------------------------------------------------------------------------------------------------------------------------------------------|
| NESDA [34]                      | Cohort of mostly patients with a major depressive or anxiety disorder | 1925 | Most individuals are patients with a major depressive or anxiety disorder | none                   | Enzymatic assay at both visits                                                                   | Serum creatinine was measured at baseline and at follow-up 2 years later. Outliers (>4SD from mean) were excluded.                          | NESDA was supported by the Geestkracht program of ZonMW [grant 10-000-1002]; matching funds from universities and mental health care institutes involved in NESDA. Funding support was also provided by the Netherlands Scientific Organization (904-61-090, 904-61-193, 480-04-004, 400-05-717), Centre for Medical Systems Biology (NWO Genomics), the Neuroscience Campus Amsterdam and the EMGO institute; the European Union (EU/WLRT-2001-01254), NIMH (RO1 MH059160). Genotyping was funded by the Genetic Association Information Network (GAIN) of the Foundation for the US National Institutes of Health, and analysis were supported by grants from GAIN and the NIMH (MH081802) and the Center for Molecular and Systems Biology (CMSB). Genotype data were obtained from dbGaP ( <a href="http://www.ncbi.nlm.nih.gov/dbgap">http://www.ncbi.nlm.nih.gov/dbgap</a> , accession number phs000020.v1.p1. Statistical analyses were partly conducted at the Genetic Cluster Computer ( <a href="http://www.geneticcluster.org">http://www.geneticcluster.org</a> ), which is financially supported by the Netherlands Scientific Organization (NWO 480-05-003) along with a supplement from the Dutch Brain Foundation. |
| Popgen [35]                     | prospective population based                                          | 577  | none                                                                      | none                   | Serum creatinine was measured using an enzymatic assay for baseline and at the 5-year follow-up. | Serum creatinine was measured using an enzymatic assay for baseline and at the 5-year follow-up.                                            | POPGEN: This study was funded by the German National Genome Research Network (NGFN; Federal Ministry of Education and Research, grant numbers 1GS0121, 01GS0171, 01GR0468) and by the DFG Excellence Cluster 'Inflammation at Interfaces' (EXC 306).                                                                                                                                                                                                                                                                                                                                                                                                                                                                                                                                                                                                                                                                                                                                                                                                                                                                                                                                                                               |
| PREVEND (4 year follow-up) [36] | Prospective population-based                                          | 791  | Enriched for higher levels of albuminuria                                 | DM1 and pregnant women | Enzymatic assay                                                                                  | Serum creatinine was measured at baseline and follow-up screenings; in this subset, the follow-up took place for 4 years after recruitment. | The PREVEND Study was financially supported by several grants from the Dutch Kidney Foundation.                                                                                                                                                                                                                                                                                                                                                                                                                                                                                                                                                                                                                                                                                                                                                                                                                                                                                                                                                                                                                                                                                                                                    |

|                                 |                                |       |                                           |                                                                                                                                                                                                                                                                                                                                           |                                                          |                                                                                                                     |                                                                                                                                                                                                                                                                                                                                                                                                                                                                                                                                                                                                                                                                                                                                                                                                                                                                                                                                                                                                                                                                                                                                                                                                                                                                                                                                                                                                                                                                                                                                                              |
|---------------------------------|--------------------------------|-------|-------------------------------------------|-------------------------------------------------------------------------------------------------------------------------------------------------------------------------------------------------------------------------------------------------------------------------------------------------------------------------------------------|----------------------------------------------------------|---------------------------------------------------------------------------------------------------------------------|--------------------------------------------------------------------------------------------------------------------------------------------------------------------------------------------------------------------------------------------------------------------------------------------------------------------------------------------------------------------------------------------------------------------------------------------------------------------------------------------------------------------------------------------------------------------------------------------------------------------------------------------------------------------------------------------------------------------------------------------------------------------------------------------------------------------------------------------------------------------------------------------------------------------------------------------------------------------------------------------------------------------------------------------------------------------------------------------------------------------------------------------------------------------------------------------------------------------------------------------------------------------------------------------------------------------------------------------------------------------------------------------------------------------------------------------------------------------------------------------------------------------------------------------------------------|
| PREVEND (9 year follow-up) [36] | Prospective population-based   | 2169  | Enriched for higher levels of albuminuria | DM1 and pregnant women                                                                                                                                                                                                                                                                                                                    | Enzymatic assay                                          | Serum creatinine was measured at baseline and follow-up screenings, that took place approximately every three years | The PREVEND Study was financially supported by several grants from the Dutch Kidney Foundation.                                                                                                                                                                                                                                                                                                                                                                                                                                                                                                                                                                                                                                                                                                                                                                                                                                                                                                                                                                                                                                                                                                                                                                                                                                                                                                                                                                                                                                                              |
| The Rotterdam Study-II [21-23]  | Prospective, population-based. | 1,895 | None                                      | Any samples with a call rate < 97.5%, excess autosomal heterozygosity > 0.336 (~FDR < 0.1%), mismatch between called and phenotypic gender, or if there were outliers identified by the IBS clustering analysis (see below) with > 3 standard deviations from population mean or IBS probabilities > 97% were excluded from the analysis. | Baseline and the third periodical visit: enzymatic assay | Creatinine levels were measured at baseline and at the third periodical visit.                                      | Rotterdam Study II: The GWA study was funded by the Netherlands Organisation of Scientific Research NWO Investments (nr. 175.010.2005.011, 911-03-012), the Research Institute for Diseases in the Elderly (014-93-015; RIDE2), the Netherlands Genomics Initiative (NGI)/Netherlands Consortium for Healthy Aging (NCHA) project nr. 050-060-810. We thank Pascal Arp, Mila Jhamai, Dr Michael Moorhouse, Marijn Verkerk, and Sander Bervoets for their help in creating the GWAS database. The Rotterdam Study is funded by Erasmus Medical Center and Erasmus University, Rotterdam, Netherlands Organization for the Health Research and Development (ZonMw), the Research Institute for Diseases in the Elderly (RIDE), the Ministry of Education, Culture and Science, the Ministry for Health, Welfare and Sports, the European Commission (DG XII), and the Municipality of Rotterdam. The authors are very grateful to the participants and staff from the Rotterdam Study, the participating general practitioners and the pharmacists. We would like to thank Dr. Tobias A. Knoch, Luc V. de Zeeuw, Anis Abuseiris, and Rob de Graaf as well as their institutions the Erasmus Computing Grid, Rotterdam, The Netherlands, and especially the national German MediGRID and Services@MediGRID part of the German D-Grid, both funded by the German Bundes-ministerium für Forschung und Technology under grants #01 AK 803 A-H and #01 IG 07015 G, for access to their grid resources. Abbas Dehghan is supported by NWO grant (vici, 918-76-619). |

|                                                     |                                  |      |      |                                                                                                                                               |                                                                                                                                                |                                                                                                                      |                                                                                                                                                                                                                                                                                                                                                                                                                                                                                                                                                                                                                                                          |
|-----------------------------------------------------|----------------------------------|------|------|-----------------------------------------------------------------------------------------------------------------------------------------------|------------------------------------------------------------------------------------------------------------------------------------------------|----------------------------------------------------------------------------------------------------------------------|----------------------------------------------------------------------------------------------------------------------------------------------------------------------------------------------------------------------------------------------------------------------------------------------------------------------------------------------------------------------------------------------------------------------------------------------------------------------------------------------------------------------------------------------------------------------------------------------------------------------------------------------------------|
| SAPHIR [37,38]                                      | healthy working population       | 1726 | none | Of the 1726 subjects genotyped, 1374 had serum creatinine measurements at both examinations and were thus available for the current analyses. | Modified kinetic Jaffé reaction (CREA®, Roche Diagnostics GmbH, Mannheim, Germany) in the serum                                                | In May 2003 the first follow-up examination was started. Follow-up of the study population was continued until 2008. | The SAPHIR-study was partially supported by a grant from the Kamillo Eisner Stiftung to B. Paulweber and by grants from the "Genomics of Lipid-associated Disorders – GOLD" of the "Austrian Genome Research Programme GEN-AU" to F. Kronenberg.                                                                                                                                                                                                                                                                                                                                                                                                         |
| Cardiovascular risk in Young Finns Study (YFS) [39] | population-based follow up-study | 1683 | None | None                                                                                                                                          | Serum creatinine was determined spectrophotometrically by the Jaffé method (picric acid; Olympus Diagnostica GmbH) from frozen plasma samples. | Serum creatinine was measured at baseline and at the 6 year follow-up.                                               | The Young Finns Study has been financially supported by the Academy of Finland: grants 134309 (Eye), 126925, 121584, 124282, 129378 (Salve), 117787 (Gendi), and 41071 (Skidi), the Social Insurance Institution of Finland, Kuopio, Tampere and Turku University Hospital Medical Funds (grant 9M048 and 9N035 for TeLeht), Juho Vainio Foundation, Paavo Nurmi Foundation, Finnish Foundation of Cardiovascular Research and Finnish Cultural Foundation, Tampere Tuberculosis Foundation and Emil Aaltonen Foundation (T.L). The expert technical assistance in the statistical analyses by Ville Aalto and Irina Lisinen is gratefully acknowledged. |



**Supplementary Table 2.** Study-specific genotyping information for stage 1 and stage 2 studies.

| Study                  | Array type        | Genotype calling | Quality control filters for genotyped SNPs used for imputation                                                            | No. of SNPs used for imputation | Imputation          | Imputation backbone for phased CEU haplotypes (NCBI build) | Filtering of imputed genotypes <sup>1</sup> | Data management and statistical analysis             | Population stratification or principal components (PCs)                                                                                                                                                         |
|------------------------|-------------------|------------------|---------------------------------------------------------------------------------------------------------------------------|---------------------------------|---------------------|------------------------------------------------------------|---------------------------------------------|------------------------------------------------------|-----------------------------------------------------------------------------------------------------------------------------------------------------------------------------------------------------------------|
| <b>Stage 1 cohorts</b> |                   |                  |                                                                                                                           |                                 |                     |                                                            |                                             |                                                      |                                                                                                                                                                                                                 |
| <b>AGES</b>            | Illumina Hu370CNV | Illumina         | call rate<97%;<br>MAF<1%;<br>pHWE<1e-6<br>mishap p<1e-9,<br>SNPs not in Hapmap or strandedness issues merging with Hapmap | 329,804                         | MACH version 1.0.16 | HapMap release 22 (build 36)                               | none                                        | R, ProbABEL, Linear and Logistic Regression          | We observed no association for the tested traits with the 10 PCs estimated using Eigenstrat. <sup>[1]</sup>                                                                                                     |
| <b>Amish Studies</b>   | Affymetrix 500K   | BRLMM            | call rate<95%<br>MAF<1%,<br>pHWE<10E-6<br>SNPs not in Hapmap                                                              | 338,598                         | MACH version 1.0.15 | phased CEU haplotypes, HapMap release 22 (build 36)        | none                                        | Measured genotype accounting for polygenic component | NA                                                                                                                                                                                                              |
| <b>ARIC</b>            | Affymetrix 6.0    | Birdseed         | call rate <95%<br>MAF<1%<br>pHWE <10E-5                                                                                   | 669,450                         | MACH version 1.0.16 | HapMap release 22 (build 36)                               | none                                        | ProbABEL, PLINK, R                                   | Significant association was observed between some of the top 10 PCs estimated using Eigenstrat. The appropriate PCs were therefore included in the respective stratum as covariates in the association analyses |

|                                           |                                                |                     |                                                                                                                                                  |         |                      |                                  |                        |                                                                                                 |                                                                                                                                                                                                                                          |
|-------------------------------------------|------------------------------------------------|---------------------|--------------------------------------------------------------------------------------------------------------------------------------------------|---------|----------------------|----------------------------------|------------------------|-------------------------------------------------------------------------------------------------|------------------------------------------------------------------------------------------------------------------------------------------------------------------------------------------------------------------------------------------|
| <b>ASPS</b>                               | Illumina Human610-Quad BeadChip                | Illumina            | call rate<98%<br>MAF<0.01<br>pHWE<1e-6<br>mishap p<1e-9<br>Mendelian errors>100, SNPs not in Hapmap or strandedness issues merging with Hapmap   | 550,635 | MACH version 1.0.15  | HapMap release 22 (build 36)     | none                   | R, linear and logistic fixed effects model                                                      | NA                                                                                                                                                                                                                                       |
| <b>Cardio-vascular Health Study (CHS)</b> | Illumina 370CNV                                | Illumina BeadStudio | call rate<97%,<br>MAF<1%<br>pHWE<10E-5<br>heterozygotes=0;<br>SNPs not in HapMap                                                                 | 306,655 | BimBam version 0.99  | HapMap CEU release 22 (build 36) | dosage variance < 0.01 | Linear and logistic regression using R, robust SE estimation                                    | Study sites (clinic sites) were included as covariates in the regression to account for population stratification.                                                                                                                       |
| <b>CoLaus</b>                             | Affymetrix 500K                                | BRLMM               | Call rate<70%,<br>MAF<1%<br>pHWE<1E-7                                                                                                            | 390,029 | IMPUTE version 0.2.0 | HapMap release 21 (build 35)     | none                   | Matlab                                                                                          | First 4 ancestry PCs were significantly associated both with eGFR and CKD, thus were included in the analysis.                                                                                                                           |
| <b>Framingham Heart Study (FHS)</b>       | Affymetrix 500K<br>Affymetrix 50K supplemental | Affymetrix          | call rate<97%<br>pHWE<1e-6<br>MAF<1%<br>mishap p<1e-9;<br>Mendelian errors>100;<br>SNPs not in Hapmap or strandedness issues merging with Hapmap | 378,163 | MACH version 1.0.15  | HapMap release 22 (build 36)     | none                   | R, linear mixed effect models and GEE models, robust variance option to account for relatedness | We observed no association with CKD with the 10 PCs estimated using Eigenstrat. Significant association between eGFR and the 10 PCs was observed therefore, PCs were included in the analysis for association between genotype and eGFR. |

|                   |                                                                                 |                                                           |                                                                                                         |                                                                                      |                     |                                                     |      |                                          |                                                                                                                                                                                          |
|-------------------|---------------------------------------------------------------------------------|-----------------------------------------------------------|---------------------------------------------------------------------------------------------------------|--------------------------------------------------------------------------------------|---------------------|-----------------------------------------------------|------|------------------------------------------|------------------------------------------------------------------------------------------------------------------------------------------------------------------------------------------|
| <b>GENOA</b>      | Affymetrix 6.0 (primary), Illumina 610-Quad, Illumina 660-Quad, Illumina 1M-Duo | Birdseed (Affymetrix data), Genome Studio (Illumina data) | Call Rate<95%, MAF<1%; pHWE < 0.001                                                                     | 1,233,495 (because of the different platforms, some SNPs may have had many missings) | MACH version 1.0.16 | HapMap release 22 (build 36), CEU founders          | none | R, multic and GEE                        | Using the PLINK --cluster option, we did not observe any population stratification (all subjects placed within the same cluster). We did not adjust for PCs in the association analysis. |
| <b>Health ABC</b> | Illumina 1M                                                                     | BeadStudio v3.3.7                                         | MAF<1% call rate<97% pHWE<10 <sup>-6</sup>                                                              | 914,263                                                                              | MACH version 1.0.16 | HapMap CEPH release 22 (build 36)                   | none | R, linear and logistic regression models | Adjust for the 1st PC                                                                                                                                                                    |
| <b>Hypergenes</b> | Illumina 1M Duo                                                                 | Illumina                                                  | call rate<99%, MAF<0.01                                                                                 | 882935                                                                               | MACH version 1.0    | phased CEU haplotypes, HapMap release 22 (build 36) | none | No relatedness                           | correct for study center                                                                                                                                                                 |
| <b>JUPITER</b>    | Illumina Omni 1 Quad                                                            | Genome Studio                                             | Call rate < 98.5%, MAF<1%, pHWE<1E-6                                                                    | 979,089                                                                              | MACH version 1.0.15 | 1000 Genomes, release 6/2010                        | none | R                                        | Ten PCs from EIGENSTRAT included                                                                                                                                                         |
| <b>KORA S3/F3</b> | Affymetrix 500K                                                                 | BRLMM                                                     | per-chip call rate <93%; MAF<5%; discrepancy for one of the 50 SNPs common on both chips; gender checks | 380,407                                                                              | MACH                | HapMap release 22 (build 35)                        | none | MACH2QTL, PROBABEL, R, VISUAL BASIC      | NA                                                                                                                                                                                       |
| <b>KORA S4/F4</b> | Affymetrix 6.0                                                                  | BRLMM                                                     | per-chip call rate <93%; per SNP call rate <93%; MAF<1%; gender checks                                  | 629,893                                                                              | MACH                | HapMap release 22 (build 36)                        | none | MACH2QTL, PROBABEL, R, VISUAL BASIC      | NA                                                                                                                                                                                       |

|                            |                                                         |                         |                                                                                                                                                                        |         |                            |                                                                                                                                               |                                                                        |                                                                                                  |                                                                                                                                                       |
|----------------------------|---------------------------------------------------------|-------------------------|------------------------------------------------------------------------------------------------------------------------------------------------------------------------|---------|----------------------------|-----------------------------------------------------------------------------------------------------------------------------------------------|------------------------------------------------------------------------|--------------------------------------------------------------------------------------------------|-------------------------------------------------------------------------------------------------------------------------------------------------------|
| <b>Rotterdam Study – I</b> | Version 3<br>Illumina<br>Infinium II<br>HumanHap5<br>50 | BeadStudio              | call rate<90%;<br>MAF<0.01;<br>pHWE<1E-5;<br>Mendelian<br>errors>100; SNPs<br>not in Hapmap or<br>strandedness<br>issues merging<br>with Hapmap                        | 491,875 | MACH                       | HapMap<br>release 22<br>(build 36)                                                                                                            | none                                                                   | ProbABEL                                                                                         | NA                                                                                                                                                    |
| <b>SHIP</b>                | Affymetrix<br>6.0                                       | Affymetrix<br>Birdseed2 | none                                                                                                                                                                   | 869,224 | IMPUTE<br>version<br>0.5.0 | HapMap<br>release 22<br>(build 36)                                                                                                            | none                                                                   | SNPTEST<br>v1.1.5,<br>QUICKTEST<br>v0.94, R,<br>InforSense,<br>InterSystems<br>Caché, SAS        | We observed no<br>population<br>stratification<br>using PCs<br>estimated using<br>Eigenstrat. <sup>[1]</sup>                                          |
| <b>3 City Study</b>        | Illumina<br>610K                                        | Illumina                | Call rate<98%,<br>MAF<1%,<br>pHWE<1E-6                                                                                                                                 | 537,029 | MACH<br>version<br>1.0.15  | HapMap<br>release 22<br>(build 36.3)                                                                                                          | none                                                                   | SAS,<br>ProbABEL and<br>R, linear or<br>logistic<br>regression                                   | none                                                                                                                                                  |
| <b>Stage 2<br/>cohorts</b> |                                                         |                         |                                                                                                                                                                        |         |                            |                                                                                                                                               |                                                                        |                                                                                                  |                                                                                                                                                       |
| <b>ADVANCE</b>             | Affymetrix<br>5.0<br>Affymetrix<br>6.0                  | Affymetrix              | SNPs genotyped<br>on affymetrix 5.0:<br>call rate <96%<br>(<99% if MAF<br><5%);<br><br>SNPs genotyped<br>on affymetrix 6.0:<br>Call rate < 97%<br>(<99% if MAF<br><5%) | 876688  | IMPUTE2<br>v2.1.2          | Impute2<br>Website<br>1000G Pilot<br>(CEU -<br>Jun2010) +<br>HapMap3<br>release 2 (all<br>available<br>haplotypes –<br>Feb2009)<br>(build 36) | YES (SNPs<br>with<br>imputation<br>info < 0.5<br>were filtered<br>out) | SNPTEST,<br>frequentist<br>additive<br>model using a<br>missing data<br>likelihood<br>score test | Eigenstrat. Two<br>first principle<br>components<br>were included in<br>the analysis for<br>association<br>between<br>genotype and all<br>phenotypes. |

|                                        |                                     |          |                                                                                                          |         |                      |                                                     |                   |                                 |                                                                                                                                                                                                                                                             |
|----------------------------------------|-------------------------------------|----------|----------------------------------------------------------------------------------------------------------|---------|----------------------|-----------------------------------------------------|-------------------|---------------------------------|-------------------------------------------------------------------------------------------------------------------------------------------------------------------------------------------------------------------------------------------------------------|
| <b>Blue Mountains Eye Study (BMES)</b> | Custom Illumina Infinium 670k array | Illumina | Call rate<95%,<br>MAF<1%,<br>pHWE<1E-6,<br>SNPs not in Hapmap or strandedness issues merging with Hapmap | 501,910 | MACH version 1.0.16  | HapMap release 22 (build 36)                        | MAF<1%<br>Rsq<0.3 | SAS, linear and logistic models | No association was observed between either CKD or eGFR and the top 4 dimensions estimated using multi-dimensional scaling in PLINK. Therefore no ancestry dimensions were included in the analysis for association between genotype and either CKD or eGFR. |
| <b>CoLaus</b>                          | Affymetrix 500K                     | BRLMM    | Call rate<70%,<br>MAF<1%<br>pHWE<1E-7                                                                    | 390,029 | IMPUTE version 0.2.0 | HapMap release 21 (build 35)                        | none              | Matlab                          | First 4 ancestry PCs were significantly associated both with eGFR and CKD, thus were included in the analysis.                                                                                                                                              |
| <b>HYPERGENES</b>                      | Illumina 1M Duo                     | Illumina | call rate<99%,<br>MAF<0.01                                                                               | 882935  | MACH version 1.0     | phased CEU haplotypes, HapMap release 22 (build 36) | none              | No relatedness                  | correct for study center                                                                                                                                                                                                                                    |

|                                                        |                                            |                       |                                                                                                                                                                                                                   |                |                     |                                                     |                                            |                                                                                                 |                                                                                                                          |
|--------------------------------------------------------|--------------------------------------------|-----------------------|-------------------------------------------------------------------------------------------------------------------------------------------------------------------------------------------------------------------|----------------|---------------------|-----------------------------------------------------|--------------------------------------------|-------------------------------------------------------------------------------------------------|--------------------------------------------------------------------------------------------------------------------------|
| <b>NESDA</b>                                           | Perlegen 600K, Affymetrix 600K             | Perlegen, Birdseed v2 | call rate<95%,MAF<1%, not mapped, HWE p <10 <sup>-6</sup> , strand ambiguities, high disconcordance between genotyping platforms or between positive controls, non-random genotypic failure, >5% Mendelian errors | 435291, 560631 | Beagle 3.04         | HapMap release 23 (build 36)                        | none                                       | SNPTEST, R                                                                                      | First 10 PCs were used as covariates                                                                                     |
| <b>Popgen</b>                                          | Affymetrix 6.0                             | Birdseed v2           | sample call rate <0.90; SNP call rate <0.95; MAF<1% pHWE<0.0001;                                                                                                                                                  | 709,003        | MACH version 1.0.16 | phased CEU haplotypes, HapMap release 22 (build 36) | none                                       | PLINK, R                                                                                        | NA                                                                                                                       |
| <b>PREVEND</b>                                         | HumanCytoS NP-12v1                         | GenomeStudio          | call rate <95%, pHWE<0.0001, MAF <0.01                                                                                                                                                                            | 232571         | BEAGLE 3.2          | phased CEU haplotypes, HapMap release 22 (build 36) | PLINK 1.07 filters INFO <0.1 and MAF <0.01 | STATA 11MP, PLINK 1.07                                                                          | -                                                                                                                        |
| <b>Rotterdam Study – II</b>                            | Version 3 Illumina Infinium II HumanHap550 | BeadStudio            | call rate<90% MAF<0.01; pHWE<1E-5 Mendelian errors>100; SNPs not in Hapmap or strandedness issues merging with Hapmap                                                                                             | 495,478        | MACH                | HapMap release 22 (build 36)                        | none                                       | ProbABEL                                                                                        | NA                                                                                                                       |
| <b>Cardio-vascular risk in Young Finns Study (YFS)</b> | Illumina Custom BeadChip Human670K         | Illumina              | Call rate < 95%, MAF<1%, pHWE<1E-6, pi-hat > 0.2 removed due to possible relatedness                                                                                                                              | 546,677        | MACH version 1.0    | HapMap 2 release 22 (NCBI build 36 dbSNP 126)       | Rsq<0.2                                    | R, linear mixed effect models and GEE models, robust variance option to account for relatedness | We have used multidimensional scaling for genetic stratification and included the most affecting components in our model |

| De novo genotyping           | Genotyping Platform       | Method     | QC                                                                                                                                                                                            |  |  |  |  |
|------------------------------|---------------------------|------------|-----------------------------------------------------------------------------------------------------------------------------------------------------------------------------------------------|--|--|--|--|
| <b>SAPHIR</b>                | Applied Biosystems 7900HT | Taqman PCR | 70 duplicates per SNP: 2 discordants for rs11803049, 0 discordants for the other SNPs<br>HWE-testing: $p > 0.05$ for all SNPs<br>Call rate $> 98.5\%$ for all SNPs                            |  |  |  |  |
| <b>KORA S3/F3 (non-GWAS)</b> | Applied Biosystems 7900HT | Taqman PCR | 18% duplicates per SNP: 0 discordants for all SNPs<br>HWE-testing: $p > 0.05$ for all SNPs<br>Call rate $> 98.5\%$ for all SNPs                                                               |  |  |  |  |
| <b>KORA S4/F4 (non-GWAS)</b> | Applied Biosystems 7900HT | Taqman PCR | 18% duplicates per SNP: 1 discordants for rs11803049, 0 discordants for the other SNPs<br>HWE-testing: $p > 0.05$ for all SNPs<br>Call rate 97.2% for rs11803049, $> 99\%$ for all other SNPs |  |  |  |  |

**Supplementary Table 3: Details on kidney function measures over time in each study**

|                                   | CKDi cases, n    | CKDi25 cases, n  | CKDi controls, n | eGFRchange* overall (ml/min/1.73m <sup>2</sup> per year) | eGFRchange* noCKD (ml/min/1.73m <sup>2</sup> per year) | eGFRchange* CKD (ml/min/1.73m <sup>2</sup> per year) | individuals with eGFR change <0, n | Rapid3 overall cases, n | Rapid3 noCKD cases, n | Rapid3 overall controls, n |
|-----------------------------------|------------------|------------------|------------------|----------------------------------------------------------|--------------------------------------------------------|------------------------------------------------------|------------------------------------|-------------------------|-----------------------|----------------------------|
| <b>stage 1 cohorts</b>            |                  |                  |                  |                                                          |                                                        |                                                      |                                    |                         |                       |                            |
| AGES                              | 703              | 563              | 2408             | 0.8 (1.2)                                                | 0.8 (1.2)                                              | 0.1 (1.2)                                            | 597                                | 105                     | 105                   | 3110                       |
| Amish                             | NA               | NA               | NA               | 1.2 (5.3)                                                | 1.4 (5.2)                                              | NA                                                   | 192                                | NA                      | NA                    | NA                         |
| ASPS                              | 53               | 18               | 416              | 1.6 (3.8)                                                | 1.8 (3.89)                                             | -0.9 (3.0)                                           | 137                                | 135                     | 132                   | 381                        |
| KORA3                             | 153              | 104              | 1434             | 0.7 (1.8)                                                | 0.8 (1.8)                                              | -1.0 (1.9)                                           | 511                                | 144                     | 144                   | 1497                       |
| KORA4                             | 94               | 52               | 1659             | 0.6 (3.3)                                                | 0.6 (2.3)                                              | -0.1 (2.2)                                           | 662                                | 222                     | 217                   | 1585                       |
| ARIC                              | 732 <sup>A</sup> | 435 <sup>B</sup> | 7793             | 1.2 (2.6) <sup>C</sup>                                   | 1.2 (2.5)                                              | -0.4 (2.5)                                           | 2059                               | 1477                    | 1465                  | 7275                       |
| CoLaus                            | 77               | 27               | 1778             | 1.2 (2.5)                                                | 1.3 (2.4)                                              | -0.5 (2.6)                                           | 561                                | 382                     | 378                   | 1549                       |
| FHS<br>(Offspring and Cohort)     | 244              | 184              | 2069             | 0.8 (2.3)                                                | 0.9 (2.4)                                              | -0.7 (1.4)                                           | 931                                | 289                     | 287                   | 2234                       |
| GENOA                             | 54               | 30               | 942              | 0.6 (5.1)                                                | 0.7 (5.1)                                              | -0.6 (4.2)                                           | 451                                | 265                     | 256                   | 776                        |
| HABC                              | 135              | 81               | 563              | -0.1 (1.9)                                               | -0.1 (2.0)                                             | -0.2 (1.6)                                           | 474                                | 43                      | 40                    | 845                        |
| JUPITER                           | 429              | 162              | 5739             | 1.7 (8.4)                                                | 2.2 (8.6)                                              | -2.1 (5.2)                                           | 2808                               | 2497                    | 2434                  | 4396                       |
| SHIP                              | 165              | 88               | 2919             | 0.4 (3.4)                                                | 0.4 (3.4)                                              | -0.2 (3.4)                                           | 1383                               | 600                     | 582                   | 2603                       |
| <b>The Rotterdam Study (RS-I)</b> |                  |                  |                  |                                                          |                                                        |                                                      |                                    |                         |                       |                            |
| CHS                               | 283              | 129              | 1953             | 0.9 (2.2)                                                | 1.1 (2.2)                                              | -0.3 (2.0)                                           | 783                                | 371                     | 367                   | 2051                       |
| MESA                              | 224              | 97               | 2129             | 0.4 (3.4)                                                | 0.6 (3.5)                                              | -0.5 (2.7)                                           | 1356                               | 430                     | 397                   | 2390                       |
| 3C                                | 291              | 70               | 1723             | 0.7 (2.2)                                                | 0.8 (2.3)                                              | 0.1 (1.9)                                            | 499                                | 283                     | 270                   | 2041                       |
|                                   | 282              | 80               | 1818             | 0.6 (3.2)                                                | 0.9 (3.2)                                              | -0.5 (2.6)                                           | 1502                               | 505                     | 467                   | 2084                       |
| <b>stage 2 cohorts</b>            |                  |                  |                  |                                                          |                                                        |                                                      |                                    |                         |                       |                            |
| ADVANCE                           | 230              | 138              | 1479             | -0.2 (5.8)                                               | -0.1 (6.0)                                             | -0.6 (4.6)                                           | 990                                | 457                     | 413                   | 1577                       |
| BMES                              | 275              | 87               | 712              | 0.7 (1.7)                                                | 0.7 (1.9)                                              | 0.4 (0.8)                                            | 342                                | 75                      | 74                    | 1229                       |
| COLAUS                            | 51               | 15               | 2081             | 0.3 (2.5)                                                | 0.4 (2.4)                                              | -1.3 (3.6)                                           | 991                                | 250                     | 246                   | 1959                       |
| HYPERGENES                        | 14               | 11               | 633              | 1.0 (7.5)                                                | 1.1 (7.6)                                              | -1.4 (1.4)                                           | 208                                | 199                     | 199                   | 452                        |
| KORA3                             | 40               | 30               | 1191             | 0.5 (1.9)                                                | 0.5 (1.9)                                              | -0.5 (1.6)                                           | 479                                | 101                     | 101                   | 1169                       |
| KORA4                             | 45               | 26               | 1101             | 0.6 (2.5)                                                | 0.7 (2.5)                                              | -0.5 (1.7)                                           | 444                                | 173                     | 173                   | 1016                       |
| NESDA                             | 8                | 1                | 1262             | -1.2 (7.7)                                               | -1.2 (7.7)                                             | 4.1 (4.0)                                            | 695                                | 304                     | 296                   | 966                        |



|                     |     |    |      |            |            |            |     |     |     |      |
|---------------------|-----|----|------|------------|------------|------------|-----|-----|-----|------|
| <b>popgen</b>       | 46  | 14 | 496  | 0.9 (2.6)  | 1.0 (2.6)  | -0.1 (1.7) | 173 | 83  | 81  | 494  |
| <b>PREVEND 4yrs</b> | 17  | 10 | 725  | -4.1 (6.4) | -4.1 (6.5) | -2.3 (4.0) | 566 | 52  | 49  | 739  |
| <b>PREVEND 9yrs</b> | 101 | 49 | 2031 | 0.7 (1.4)  | 0.7 (1.4)  | 0.6 (1.1)  | 604 | 111 | 109 | 2058 |
| <b>RS-II</b>        | 177 | 76 | 1030 | 0.9 (1.0)  | 0.9 (1.0)  | 0.4 (0.9)  | 205 | 56  | 56  | 1187 |
| <b>SAPHIR</b>       | 33  | 10 | 1328 | 0.7 (2.9)  | 0.8 (2.9)  | -2.2 (2.6) | 521 | 244 | 244 | 1130 |
| <b>YFS</b>          | 2   | 1  | 1678 | 0.8 (2.2)  | 0.8 (2.2)  | 0.4 (0.7)  | 534 | 160 | 160 | 1523 |

\* A positive value for eGFRchange indicates a decline eGFR over time, a negative value in eGFRchange indicates a rise in eGFR over time.

<sup>A</sup> CKDi is defined as the first occurrence of eGFR < 60 at visit 2 or visit 4

<sup>B</sup> CKD25i is defined as the first occurrence of eGFR < 60 and greater than 25% drop at visit 2 or visit 4

<sup>C</sup> eGFRchange is calculated as (visit 1 eGFR - visit 4 eGFR)/(age at visit 4 - age at visit 1). If visit 4 eGFR is not available, then visit 2 eGFR and age are used. Twenty individuals with eGFRchange beyond 6SD were excluded from all analyses of eGFRchange and Rapid Decline.

**Supplementary Table 4:**

Association results of rs12917707 at UMOD in stage 1 meta-analysis for all traits analyzed. The effect allele is T, with an allele frequency of 0.18.

| trait                      | beta | SE   | pval2GC  | I2   |
|----------------------------|------|------|----------|------|
|                            | -    |      |          |      |
| <b>eGFRdecline overall</b> | 0.15 | 0.02 | 2.60E-14 | 2.7  |
|                            | -    |      |          |      |
| <b>eGFRdecline noCKD</b>   | 0.15 | 0.02 | 8.21E-13 | 0    |
|                            | -    |      |          |      |
| <b>eGFRdecline CKD</b>     | 0.20 | 0.08 | 0.01     | 0    |
|                            | -    |      |          |      |
| <b>CKDi</b>                | 0.20 | 0.04 | 9.05E-08 | 5.5  |
|                            | -    |      |          |      |
| <b>CKDi25</b>              | 0.22 | 0.05 | 3.69E-06 | 18.8 |
|                            | -    |      |          |      |
| <b>Rapid3 overall</b>      | 0.10 | 0.03 | 0.0004   | 0    |
|                            | -    |      |          |      |
| <b>Rapid3 noCKD</b>        | 0.10 | 0.03 | 0.0007   | 0    |

**Supplementary Table 5:** Imputation scores of SNPs analyzed in stage 1 and stage 2 meta-analysis

Stage 1 cohorts

| SNPID                                        | variable     | Ages | Amish | Aric | Chs  | Colaus | Genoa | Habc | Jupiter | Kora3<br>GWA | Kora4<br>GWA | Mesa | Rotterdam | Ship | Three<br>Cities | ASPS | FHS  | median |
|----------------------------------------------|--------------|------|-------|------|------|--------|-------|------|---------|--------------|--------------|------|-----------|------|-----------------|------|------|--------|
| rs1019173<br>( <i>GALNTL5/<br/>GALNT11</i> ) | oevar_imp    | 0.98 | 0.66  | 0.89 | 0.98 | 0.71   | 0.89  | 1.00 | 1.00    | 0.62         | 0.88         | 0.93 | 0.98      | 0.87 | 0.97            | 0.98 | 1.01 | 0.95   |
|                                              | imputed      | 1    | 1     | 1    | 1    | 1      | 1     | 1    | 1       | 1            | 1            | NA   | 1         | 1    | 1               | 1    | 1    |        |
|                                              | used_for_imp | 0    | 0     | 0    | 0    | 0      | 0     | 0    | 1       | 0            | 0            | 0    | NA        | 0    | 0               | NA   | 0    |        |
| rs11764932<br>( <i>MEOX2</i> )               | oevar_imp    | 0.99 | 0.94  | 0.99 | 0.86 | 0.95   | 0.99  | 0.99 | 0.99    | 0.98         | NA           | 1.02 | 1.00      | 0.99 | 1.00            | 1.00 | 0.96 | 0.99   |
|                                              | imputed      | 1    | 1     | 1    | 1    | 1      | 1     | 1    | 1       | 1            | 0            | NA   | 1         | 0    | 1               | 1    | 1    |        |
|                                              | used_for_imp | 0    | 0     | 0    | 0    | 0      | 0     | 1    | 0       | 0            | 0            | 1    | NA        | 0    | 1               | NA   | 0    |        |
| rs11803049<br>( <i>NPPA/NPPB</i> )           | oevar_imp    | 0.86 | 0.78  | 0.99 | 0.22 | 0.70   | 0.89  | 1.00 | 0.99    | 0.63         | NA           | 1.02 | 0.98      | 0.97 | 1.00            | 0.98 | 0.83 | 0.97   |
|                                              | imputed      | 1    | 1     | 0    | 1    | 1      | 1     | 1    | 0       | 1            | 0            | NA   | 0         | 0    | 1               | 1    | 1    |        |
|                                              | used_for_imp | 0    | 0     | 1    | 0    | 0      | 1     | 1    | 1       | 0            | 1            | NA   | 0         | 1    | NA              | 0    | 0    |        |
| rs12917707<br>( <i>UMOD</i> )                | oevar_imp    | 0.98 | 0.90  | 0.94 | 0.97 | 0.93   | 0.91  | 0.95 | 0.88    | 0.86         | 0.87         | 0.77 | 0.98      | 0.99 | 0.95            | 0.96 | 0.96 | 0.95   |
|                                              | imputed      | 1    | 1     | 1    | 1    | 1      | 1     | 1    | 1       | 1            | 1            | NA   | 1         | 1    | 1               | 1    | 1    |        |
|                                              | used_for_imp | 0    | 0     | 0    | 0    | 0      | 1     | 0    | 0       | 0            | 0            | NA   | 0         | 0    | NA              | 0    | 0    |        |
| rs759341<br>( <i>C2orf48</i> )               | oevar_imp    | 1.00 | 0.93  | 0.97 | 1.00 | 0.94   | 0.98  | 1.00 | 0.99    | NA           | NA           | 0.98 | 0.99      | 0.55 | 0.99            | 1.00 | 0.45 | 0.99   |
|                                              | imputed      | 1    | 1     | 0    | 0    | 0      | 1     | 1    | 0       | 0            | 0            | NA   | 0         | 0    | 1               | 1    | 1    |        |
|                                              | used_for_imp | 1    | 1     | 1    | 1    | 1      | 0     | 1    | 1       | 1            | 1            | NA   | 1         | 1    | NA              | 1    | 0    |        |
| rs875860<br>( <i>CDH23</i> )                 | oevar_imp    | 0.73 | 0.44  | 0.75 | 0.22 | 0.55   | 0.78  | 1.00 | 0.99    | 0.55         | 0.72         | 0.66 | 0.80      | 0.73 | 0.88            | 0.80 | 0.63 | 0.73   |
|                                              | imputed      | 1    | 1     | 1    | 1    | 1      | 1     | 1    | 0       | 1            | 1            | NA   | 1         | 1    | 1               | 1    | 1    |        |
|                                              | used_for_imp | 0    | 0     | 0    | 0    | 0      | 0     | 0    | 1       | 1            | 0            | 0    | NA        | 0    | 0               | NA   | 0    |        |
| rs9814367<br>( <i>IL1RAP</i> )               | oevar_imp    | 0.99 | 0.99  | 1.00 | 0.96 | 1.00   | 1.00  | 1.00 | 0.88    | NA           | NA           | 0.97 | 0.98      | 0.97 | 0.43            | 1.00 | 1.01 | 0.99   |
|                                              | imputed      | 1    | 1     | 0    | 1    | 0      | 1     | 1    | 1       | 0            | 0            | NA   | 1         | 0    | 1               | 1    | 1    |        |
|                                              | used_for_imp | 0    | 1     | 1    | 0    | 1      | 0     | 0    | 0       | 1            | 1            | NA   | 0         | 1    | NA              | 0    | 1    |        |

## stage 2 cohorts

| SNPID                              | variable     | Advance | BMES | Colaus | Hypergenes | KORAF3<br>NGWA | KORAF4<br>NGWA | Nesda | Popgen | Prevend4y | Prevend9y | Rotterdam<br>Study II | Saphir | Young<br>Finns | median |
|------------------------------------|--------------|---------|------|--------|------------|----------------|----------------|-------|--------|-----------|-----------|-----------------------|--------|----------------|--------|
| rs1019173<br>(GALNTL5/<br>GALNT11) | oevar_imp    | 0.96    | 0.98 | 0.71   | NA         | 1.00           | 1.00           | 0.92  | 0.89   | 0.96      | 1.02      | 0.98                  | 1.00   | 0.99           | 0.96   |
|                                    | imputed      | NA      | NA   | NA     | NA         | 0              | 0              | NA    | NA     | 1         | 1         | NA                    | 0      | NA             |        |
|                                    | used_for_imp | 0       | 0    | 0      | 1          | 0              | 0              | 1     | 0      | 1         | 1         | 0                     | 0      | 0              |        |
| rs11764932<br>(MEOX2)              | oevar_imp    | 1.00    | 0.99 | 0.95   | 0.99       | 1.00           | 1.00           | 0.98  | 1.00   | 0.84      | 0.92      | 0.99                  | 1.00   | 0.99           | 0.99   |
|                                    | imputed      | NA      | NA   | NA     | 1          | 0              | 0              | NA    | NA     | 1         | 1         | NA                    | 0      | NA             |        |
|                                    | used_for_imp | 1       | 0    | 0      | 0          | 0              | 0              | 1     | 0      | 0         | 0         | 0                     | 0      | 0              |        |
| rs11803049<br>(NPPA/NPPB)          | oevar_imp    | 1.00    | 1.00 | 0.72   | 1.00       | 1.00           | 1.00           | 0.98  | 0.99   | 0.66      | 0.63      | 0.98                  | 1.00   | NA             | 0.98   |
|                                    | imputed      | NA      | NA   | NA     | 1          | 0              | 0              | NA    | NA     | 1         | 1         | NA                    | 0      | NA             |        |
|                                    | used_for_imp | 1       | 1    | 0      | 0          | 0              | 0              | 1     | 0      | 0         | 0         | 0                     | 0      | NA             |        |
| rs12917707<br>(UMOD)               | oevar_imp    | 0.83    | 0.96 | 0.93   | 1.00       | 1.00           | 1.00           | 0.88  | 0.92   | 0.45      | 0.46      | 0.98                  | 1.00   | 0.88           | 0.90   |
|                                    | imputed      | NA      | NA   | NA     | 1          | 0              | 0              | NA    | NA     | 1         | 1         | NA                    | 0      | NA             |        |
|                                    | used_for_imp | 0       | 0    | 0      | 0          | 0              | 0              | 0     | 0      | 0         | 0         | 0                     | 0      | 0              |        |
| rs759341<br>(C2orf48)              | oevar_imp    | 1.00    | 0.99 | 0.96   | NA         | 1.00           | 1.00           | 0.84  | 0.98   | 0.09      | 0.09      | 0.99                  | 1.00   | NA             | 0.99\$ |
|                                    | imputed      | NA      | NA   | NA     | NA         | 0              | 0              | NA    | NA     | 1         | 1         | NA                    | 0      | NA             |        |
|                                    | used_for_imp | 1       | 1    | 1      | 1          | 0              | 0              | 1     | 1      | 0         | 0         | 1                     | 0      | NA             |        |
| rs875860<br>(CDH23)                | oevar_imp    | 0.83    | 0.80 | 0.53   | NA         | 1.00           | 1.00           | 0.68  | 0.71   | 0.03      | 0.03      | 0.80                  | 1.00   | 0.81           | 0.80*  |
|                                    | imputed      | NA      | NA   | NA     | NA         | 0              | 0              | NA    | NA     | 1         | 1         | NA                    | 0      | NA             |        |
|                                    | used_for_imp | 0       | 0    | 0      | 1          | 0              | 0              | 0     | 0      | 0         | 0         | 0                     | 0      | 0              |        |
| rs9814367<br>(IL1RAP)              | oevar_imp    | 1.00    | 0.97 | 1.00   | 1.00       | 1.00           | 1.00           | 1.00  | 1.00   | 0.94      | 1.02      | 0.97                  | 1.00   | 0.99           | 1.00   |
|                                    | imputed      | NA      | NA   | NA     | 1          | 0              | 0              | NA    | NA     | 1         | 1         | NA                    | 0      | NA             |        |
|                                    | used_for_imp | 1       | 0    | 1      | 0          | 0              | 0              | 1     | 0      | 0         | 0         | 0                     | 0      | 0              |        |

For each SNP, information on the imputation score ("oevar\_imp"), on whether the SNP was imputed ("imputed") and on whether the SNP was used for imputation ("used\_for\_imp") is shown. "1" indicates "yes", "0" indicates "no". "NA": information not provided by study.

\* median of studies participating in eGFRdecline\_CKD stage 2 meta-analysis (ADVANCE, BMES, COLAUS, RS-II)

\$ median of studies participating in CKDi25 stage 2 meta-analysis (ADVANCE, BMES, RS-II)

**Supplementary Table 6:** Morpholino sequences

| <b>Target gene</b> | <b>ATG or splice</b> | <b>MO Sequence</b>                 |
|--------------------|----------------------|------------------------------------|
| <i>cdh23</i>       | Splice               | 5' CTCCCGAACCTTCACACCACGACAT 3'    |
| <i>galnt11</i>     | ATG                  | 5' AGTAGCGCAGAGTGACGCTGCCCAT 3'    |
| <i>prkag2</i>      | ATG                  | 5' AGTCCATCACTGTACTIONTCCCATTTT 3' |
| <i>mll3a</i>       | Splice               | 5' TGTGCAGTAAGATGTTTACCTGCTT 3'    |
| <i>mll3b</i>       | Splice               | 5' ACATTTACTTCTGGTTTGACCTCTT 3'    |
| <i>umod</i>        | ATG                  | 5' CATGTTGACTGATTTTGATGGCTGA 3'    |

**Supplementary Figure 1: Genome-wide  $\log_{10}$  P value and QQ plots of stage 1 meta-analysis for each trait.**

Genetic loci moved forward to stage 2 meta-analysis are highlighted in orange in the trait they were identified in.

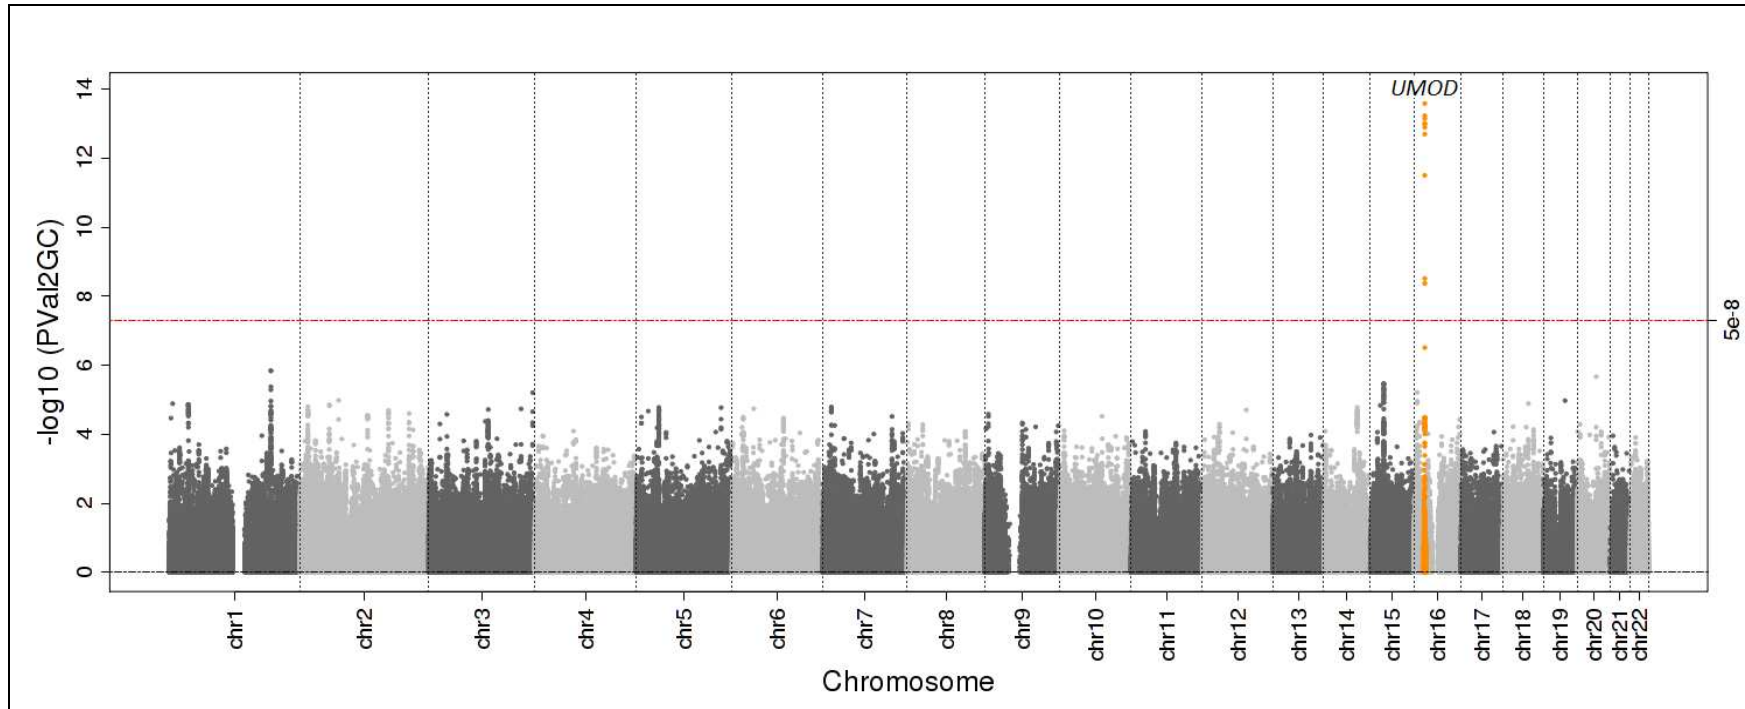**Supplementary Figure 1a:** Genome-wide  $\log_{10}$  P value plot of stage 1 meta-analysis of eGFRchange in the overall sample.

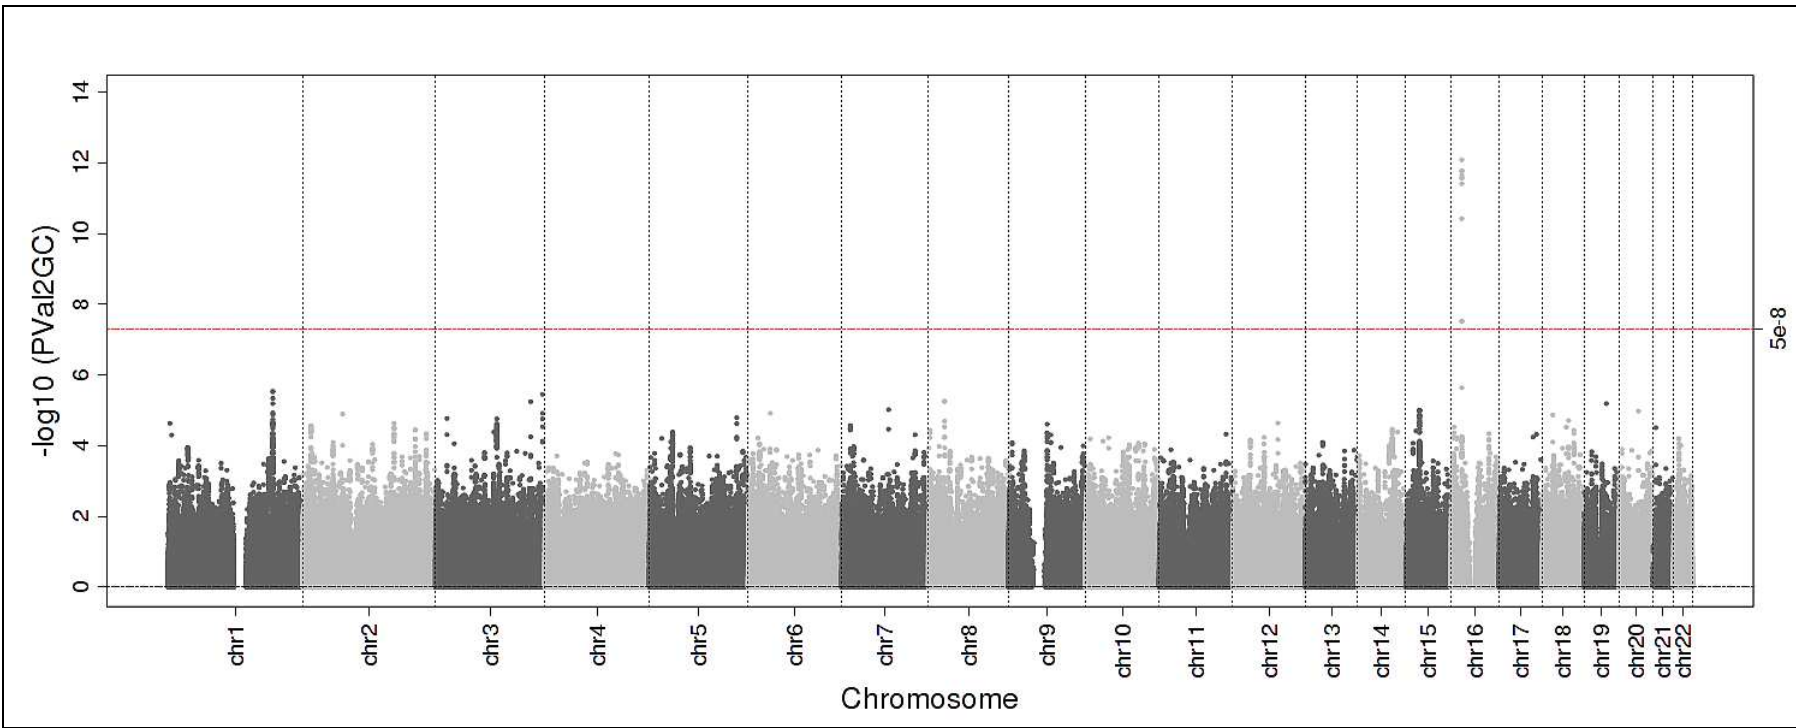

**Supplementary Figure 1b:** Genome-wide  $\log_{10}$  P value plot of stage 1 meta-analysis of eGFRchange in those without CKD at baseline.

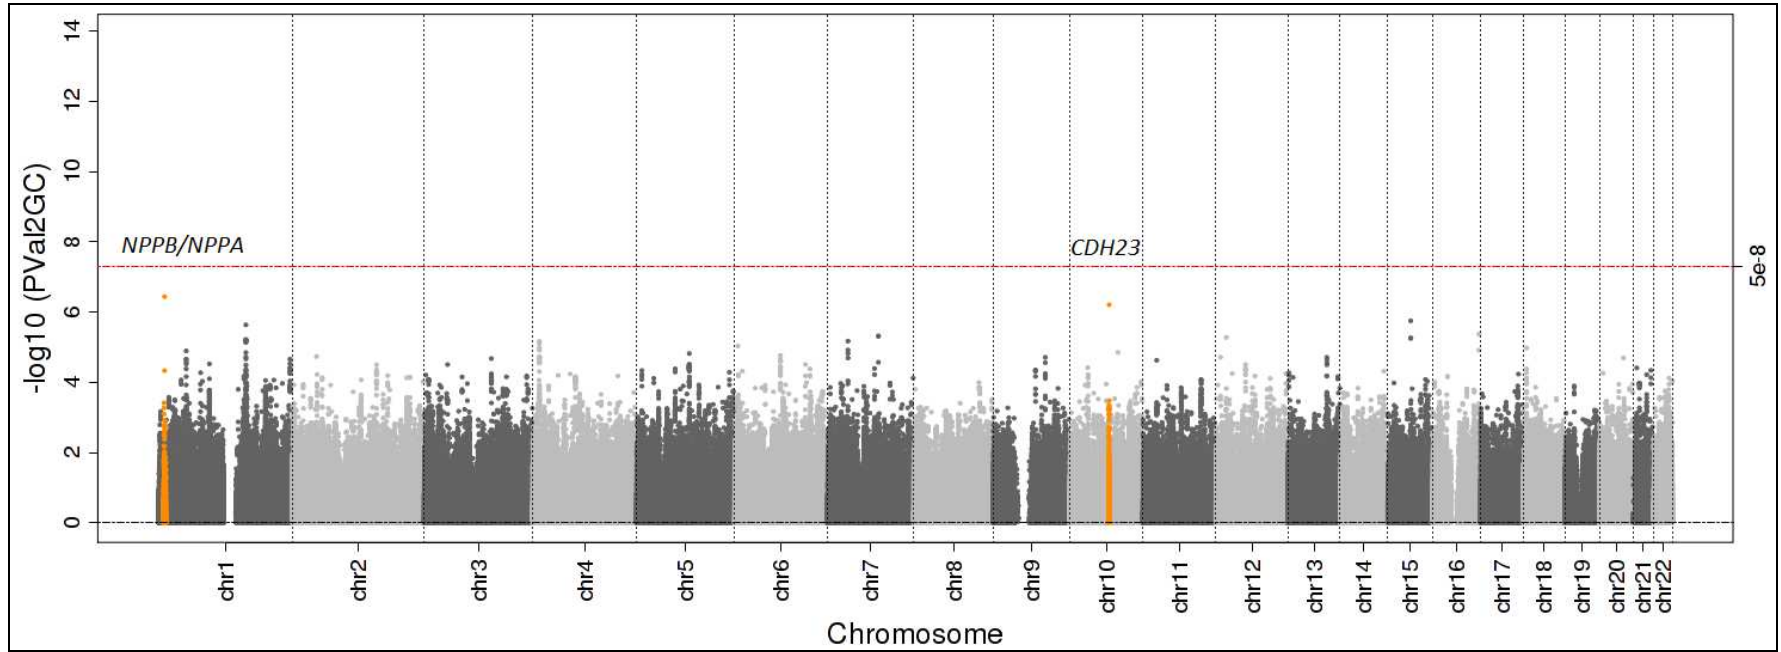

**Supplementary Figure 1c:** Genome-wide  $\log_{10}$  P value plot of stage 1 meta-analysis of eGFR change in those with CKD at baseline.



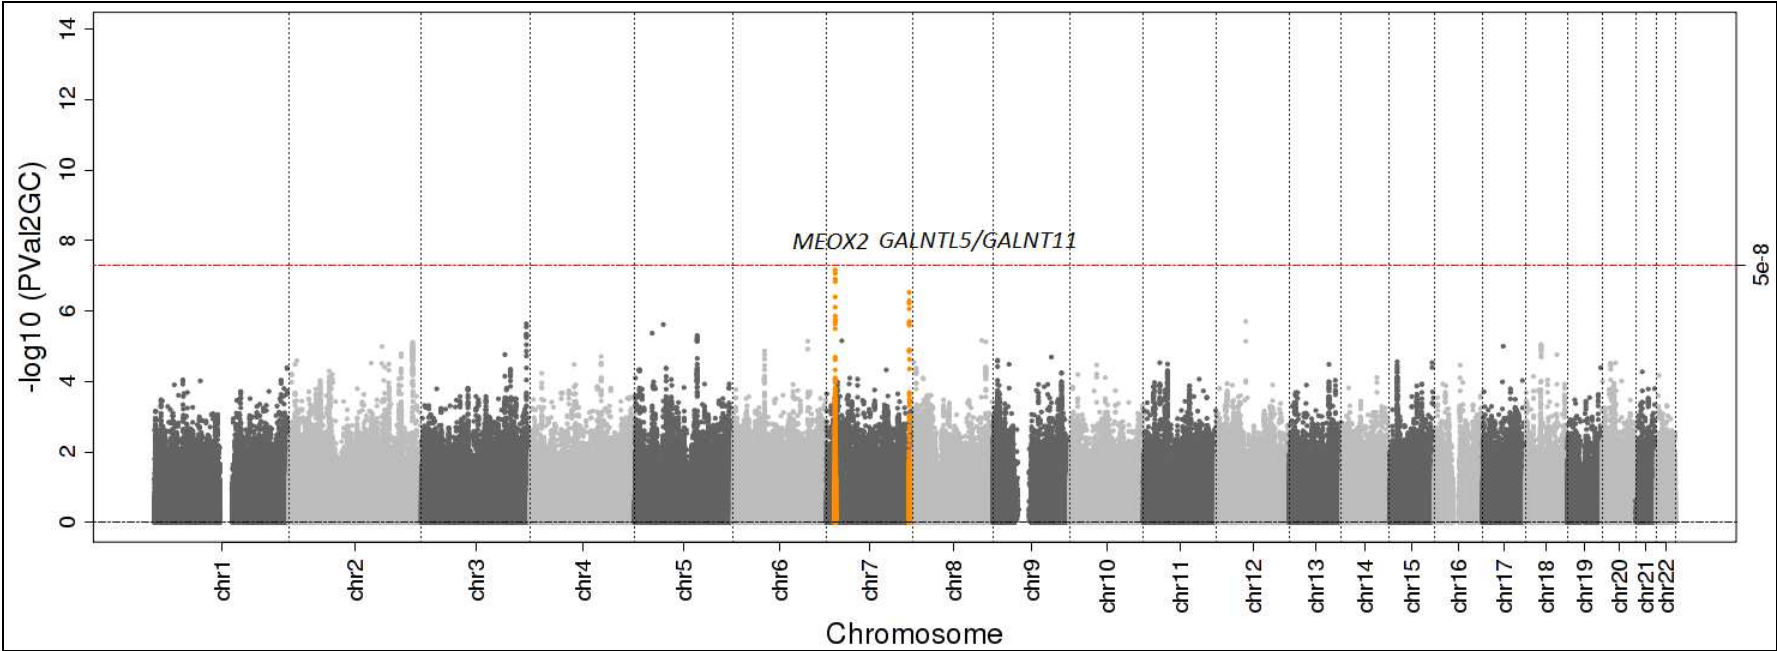

**Supplementary Figure 1d:** Genome-wide  $\log_{10} P$  value plot of stage 1 meta-analysis of Rapid Decline in the overall sample.

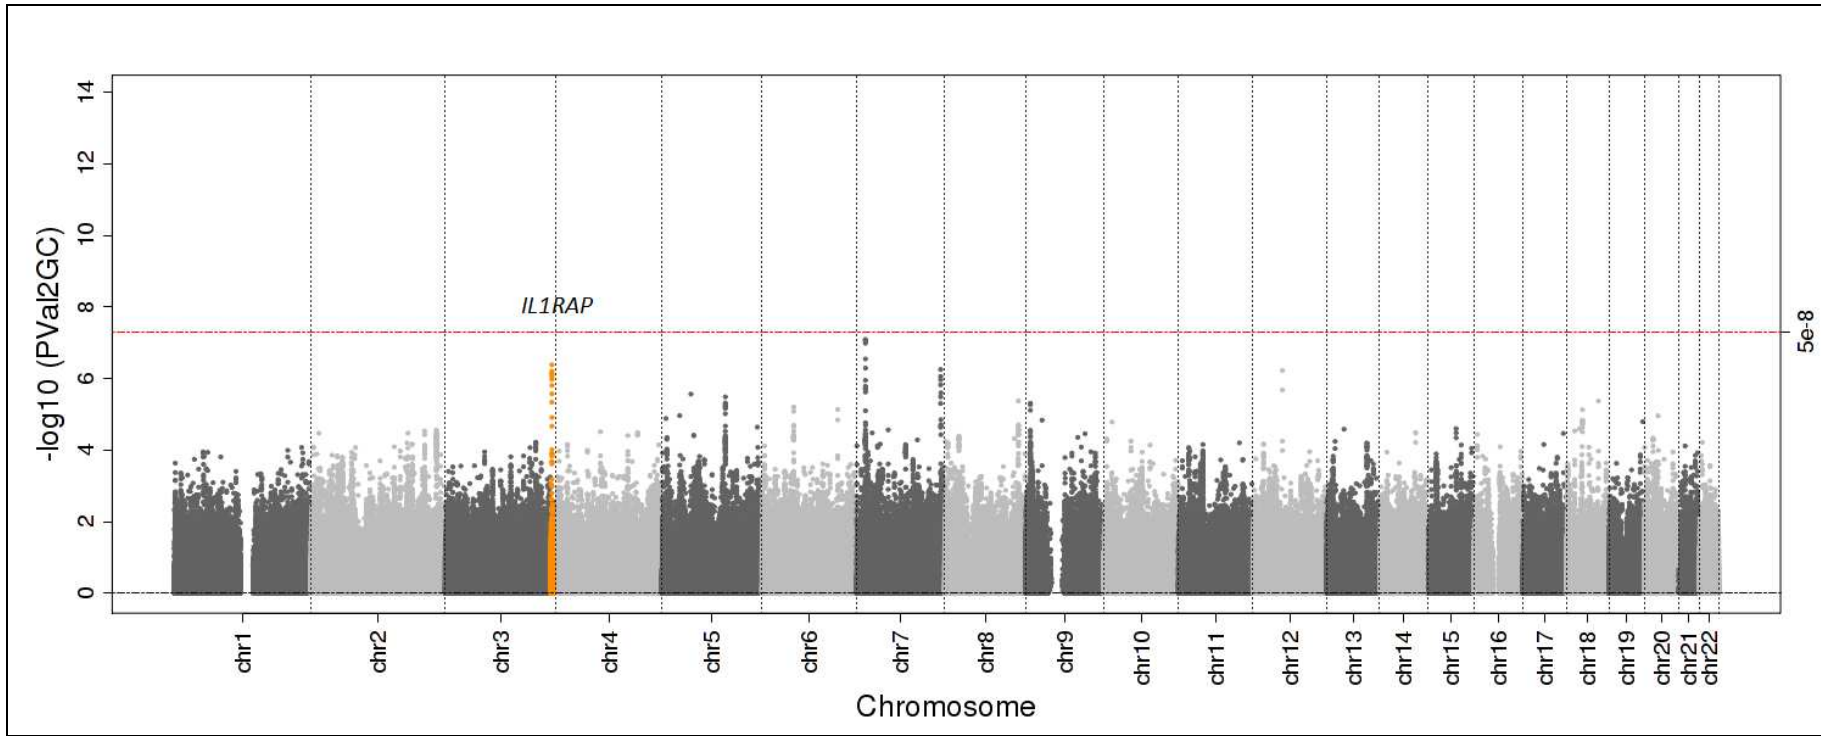

**Supplementary Figure 1e:** Genome-wide  $\log_{10}$  P value plot of stage 1 meta-analysis of Rapid Decline in those without CKD at baseline.

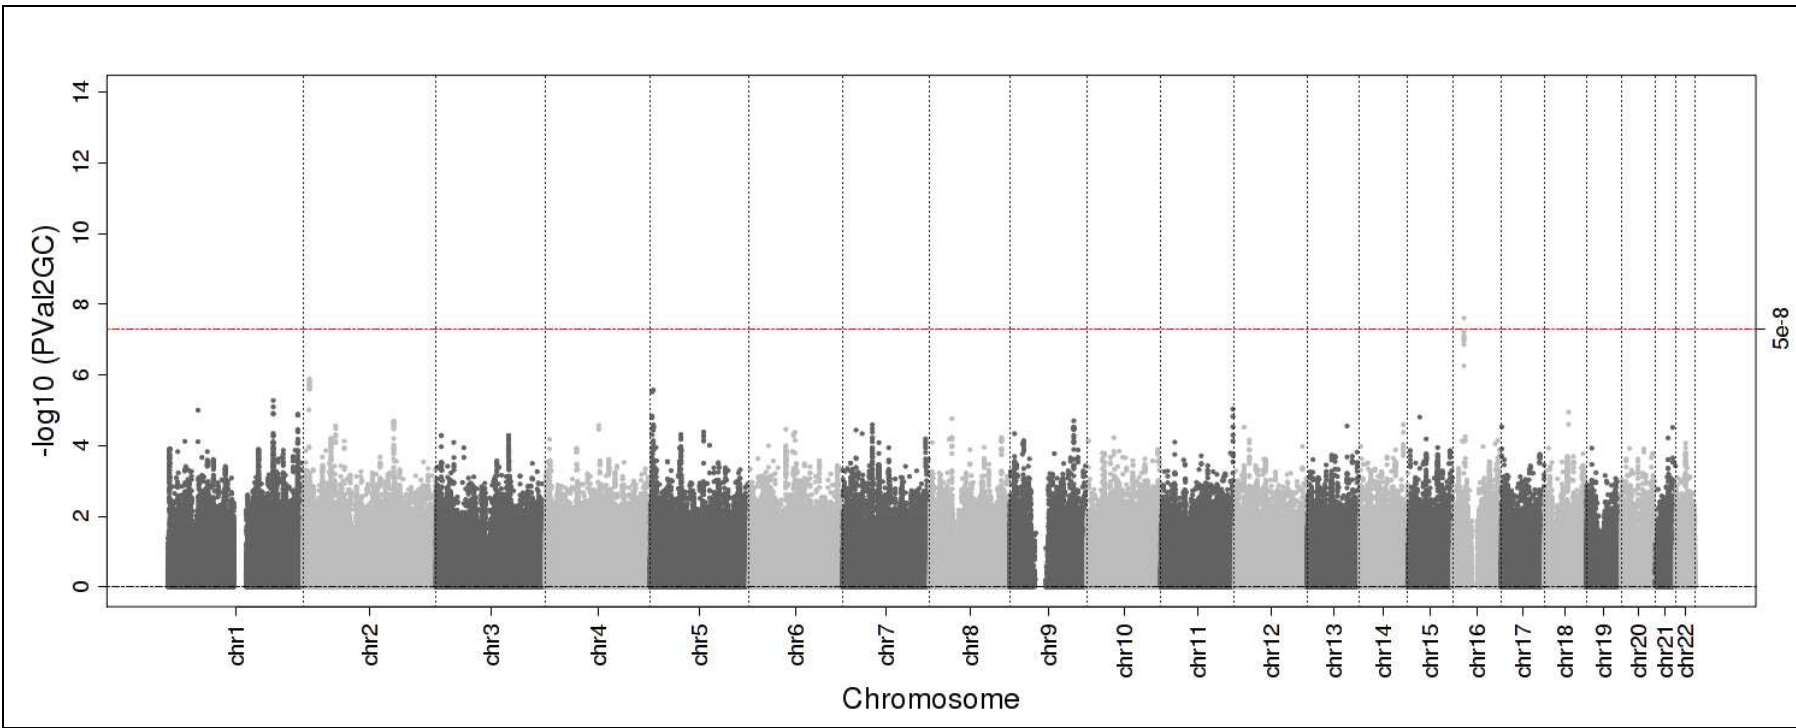

Supplementary Figure 1f: Genome-wide  $\log_{10}$  P value plot of stage 1 meta-analysis of incident CKD.

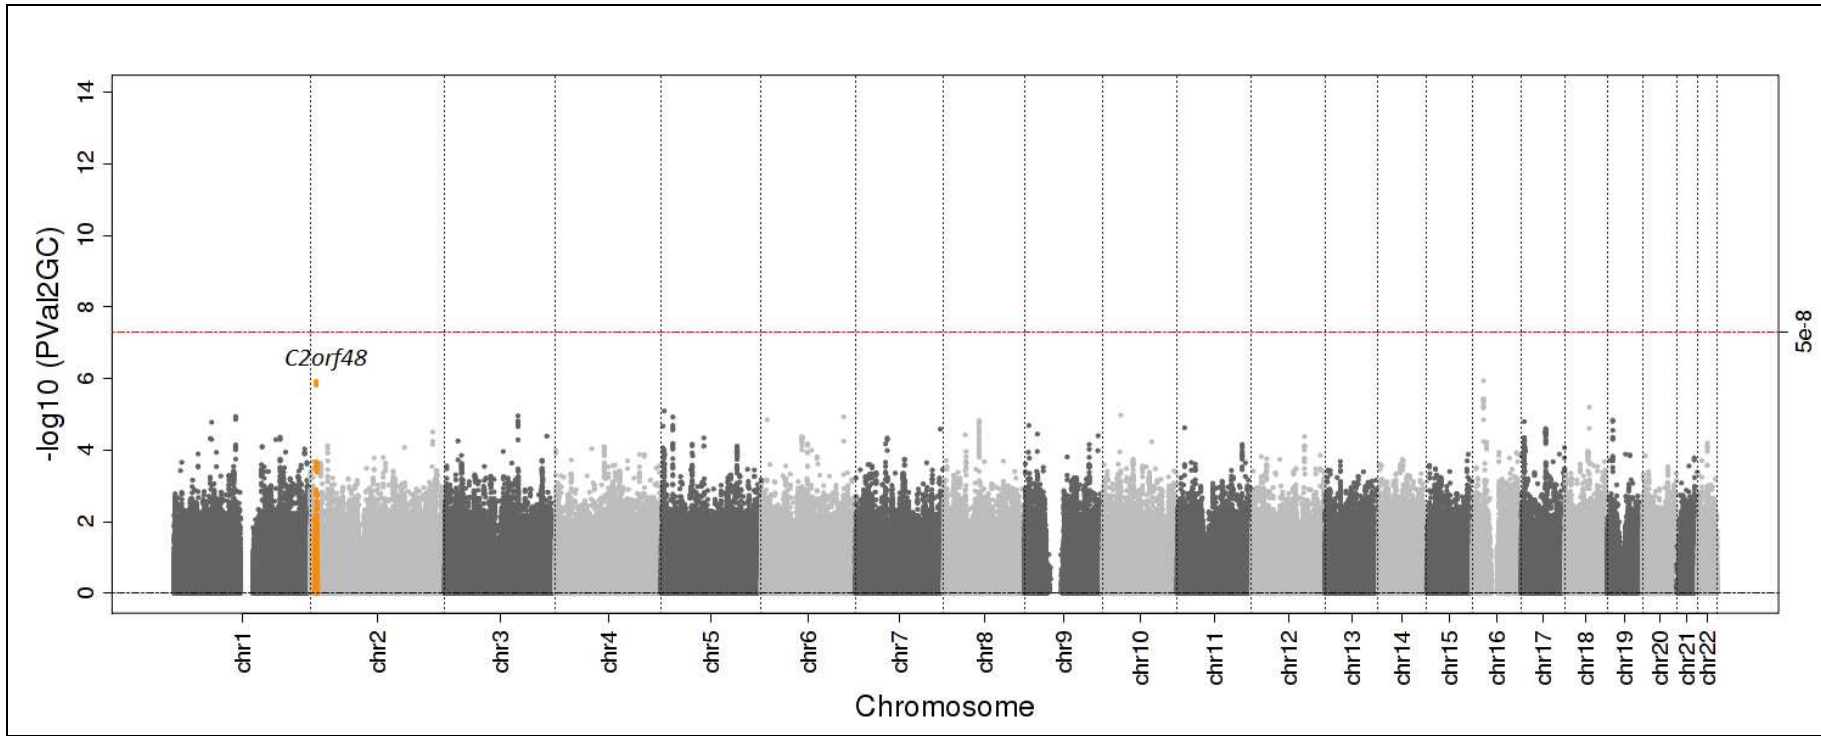

**Supplementary Figure 1g:** Genome-wide  $\log_{10}$  P value plot of stage 1 meta-analysis of CKDi25.

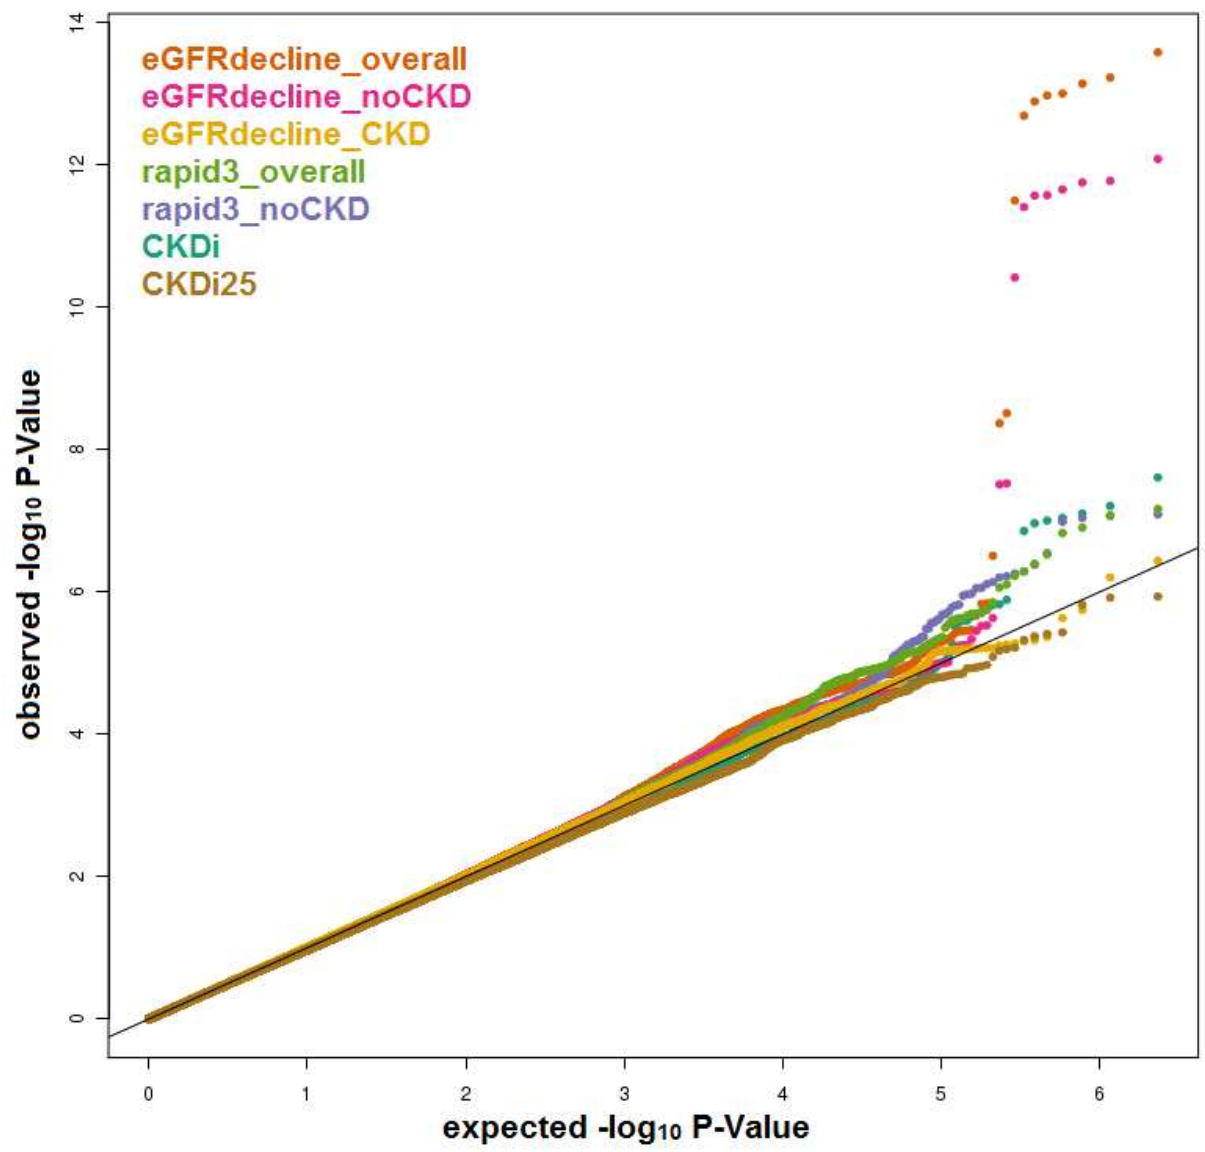

Supplementary Figure 1h: Quantile-Quantile plots of stage 1 meta-analyses.

## References

1. Harris TB, Launer LJ, Eiriksdottir G, Kjartansson O, Jonsson PV, et al. (2007) Age, Gene/Environment susceptibility-Reykjavik study: Multidisciplinary applied phenomics. *Am J Epidemiol* 165(9): 1076-1087.
2. Mitchell BD, McArdle PF, Shen H, Rampersaud E, Pollin TI, et al. (2008) The genetic response to short-term interventions affecting cardiovascular function: Rationale and design of the heredity and phenotype intervention (HAPI) heart study. *Am Heart J* 155(5): 823-828.
3. Rampersaud E, Bielak LF, Parsa A, Shen H, Post W, et al. (2008) The association of coronary artery calcification and carotid artery intima-media thickness with distinct, traditional coronary artery disease risk factors in asymptomatic adults. *Am J Epidemiol* 168(9): 1016-1023.
4. The ARIC investigators. (1989) The atherosclerosis risk in communities (ARIC) study: Design and objectives. *Am J Epidemiol* 129(4): 687-702.
5. Schmidt R, Lechner H, Fazekas F, Niederkorn K, Reinhart B, et al. (1994) Assessment of cerebrovascular risk profiles in healthy persons: Definition of research goals and the austrian stroke prevention study (ASPS). *Neuroepidemiology* 13(6): 308-313.
6. Schmidt R, Fazekas F, Kapeller P, Schmidt H, Hartung HP. (1999) MRI white matter hyperintensities: Three-year follow-up of the austrian stroke prevention study. *Neurology* 53(1): 132-139.
7. Fried LP, Borhani NO, Enright P, Furberg CD, Gardin JM, et al. (1991) The cardiovascular health study: Design and rationale. *Ann Epidemiol* 1(3): 263-276.
8. Heard-Costa NL, Zillikens MC, Monda KL, Johansson A, Harris TB, et al. (2009) NRXN3 is a novel locus for waist circumference: A genome-wide association study from the CHARGE consortium. *PLoS Genet* 5(6): e1000539.
9. Firmann et al. *BMC Cardiovasc Disord.* 2008 Mar 17;8:6
10. Feinleib M, Kannel WB, Garrison RJ, McNamara PM, Castelli WP. (1975) The framingham offspring study. design and preliminary data. *Prev Med* 4(4): 518-525.
11. Kannel WB, Feinleib M, McNamara PM, Garrison RJ, Castelli WP. (1979) An investigation of coronary heart disease in families. the framingham offspring study. *Am J Epidemiol* 110(3): 281-290.
12. Splansky GL, Corey D, Yang Q, Atwood LD, Cupples LA, et al. (2007) The third generation cohort of the national heart, lung, and blood institute's framingham heart study: Design, recruitment, and initial examination. *Am J Epidemiol* 165(11): 1328-1335.
13. Turner ST, Kardia SL, Mosley TH, Rule AD, Boerwinkle E, et al. (2006) Influence of genomic loci on measures of chronic kidney disease in hypertensive sibships. *J Am Soc Nephrol* 17(7): 2048-2055.
14. Rule AD, Jacobsen SJ, Schwartz GL, Mosley TH, Scott CG, et al. (2006) A comparison of serum creatinine-based methods for identifying chronic kidney disease in hypertensive individuals and their siblings. *Am J Hypertens* 19(6): 608-614.
15. Daniels PR, Kardia SL, Hanis CL, Brown CA, Hutchinson R, et al. (2004) Familial aggregation of hypertension treatment and control in the genetic epidemiology network of arteriopathy (GENOA) study. *Am J Med* 116(10): 676-681.
16. Cesari M, Penninx BW, Newman AB, Kritchevsky SB, Nicklas BJ, Sutton-Tyrrell K, Tracy RP, Rubin SM, Harris TB, Pahor M. Inflammatory markers and cardiovascular disease (The Health, Aging and Body Composition [Health ABC] Study). *Am J Cardiol* 2003;92(5):522-8.
17. *N Engl J Med* 2008; 359:2195-2207
18. Baumeister SE, Boger CA, Kramer BK, Doring A, Eheberg D, et al. (2010) Effect of chronic kidney disease and comorbid conditions on health care costs: A 10-year observational study in a general population. *Am J Nephrol* 31(3): 222-229.

19. Wichmann HE, Gieger C, Illig T, MONICA/KORA Study Group. (2005) KORA-gen--resource for population genetics, controls and a broad spectrum of disease phenotypes. *Gesundheitswesen* 67 Suppl 1: S26-30.
20. Bild DE, Bluemke DA, Burke GL, Detrano R, Diez Roux AV, Folsom AR, Greenland P, Jacob DR, Kronmal R, Liu K, Nelson JC, O'Leary D, Saad MF, Shea S, Szklo M, Tracy RP. Multi-ethnic study of atherosclerosis: Objectives and design. *Am J Epi* 2002 Nov 1: 156(9) 871-81
21. Hofman A, Grobbee DE, de Jong PT, van den Ouweland FA. (1991) Determinants of disease and disability in the elderly: The rotterdam elderly study. *Eur J Epidemiol* 7(4): 403-422.
22. Hofman A, Breteler MM, van Duijn CM, Krestin GP, Pols HA, et al. (2007) The rotterdam study: Objectives and design update. *Eur J Epidemiol* 22(11): 819-829.
23. Hofman A, Breteler MM, van Duijn CM, Janssen HL, Krestin GP, et al. (2009) The rotterdam study: 2010 objectives and design update. *Eur J Epidemiol* 24(9): 553-572.
24. John U, Greiner B, Hensel E, Ludemann J, Piek M, et al. (2001) Study of health in pomerania (SHIP): A health examination survey in an east german region: Objectives and design. *Soz Praventivmed* 46(3): 186-194.
25. Volzke H, Alte D, Schmidt CO, Radke D, Lorbeer R, et al. (2011) Cohort profile: The study of health in pomerania. *Int J Epidemiol* 40(2): 294-307.
26. 3C Study Group. (2003) Vascular factors and risk of dementia: Design of the three-city study and baseline characteristics of the study population. *Neuroepidemiology* 22(6): 316-325.
27. Lambert JC, Heath S, Even G, Campion D, Sleegers K, et al. (2009) Genome-wide association study identifies variants at CLU and CR1 associated with alzheimer's disease. *Nat Genet* 41(10): 1094-1099.
28. Patel A, et al for the ADVANCE Collaborative Group. Effects of a fixed combination of perindopril and indapamide on macrovascular and microvascular outcomes in patients with type 2 diabetes mellitus (the ADVANCE trial). *Lancet* 2007; 370: 829—40.
29. Albuminuria and kidney function independently predict cardiovascular and renal outcomes in diabetes. Ninomiya T, Perkovic V, de Galan BE, Zoungas S, Pillai A, Jardine M, Patel A, Cass A, Neal B, Poulter N, Mogensen CE, Cooper M, Marre M, Williams B, Hamet P, Mancia G, Woodward M, Macmahon S, Chalmers J; ADVANCE Collaborative Group. *J Am Soc Nephrol*. 2009 Aug;20(8):1813-21. doi: 10.1681/ASN.2008121270. Epub 2009 May 14.
30. Mitchell P, Smith W, Attebo K, Wang JJ. (1995) Prevalence of age-related maculopathy in australia. the blue mountains eye study. *Ophthalmology* 102(10): 1450-1460.
31. Attebo K, Mitchell P, Smith W. (1996) Visual acuity and the causes of visual loss in australia. the blue mountains eye study. *Ophthalmology* 103(3): 357-364.
32. Leeder SR, Mitchell P, Liew G, Rochtchina E, Smith W, et al. (2006) Low hemoglobin, chronic kidney disease, and risk for coronary heart disease-related death: The blue mountains eye study. *J Am Soc Nephrol* 17(1): 279-284.
33. Salvi E; Kutalik Z; Glorioso N; Benaglio P; Frau F; Kuznetsova T; Arima H; Hoggart C; Tichet J; Nikitin YP; Conti C; Seidlerova J; Tikhonoff V; Stolarz-Skrzypek K; Johnson T; Devos N; Zagato L; Guarrera S; Zaninello R; Calabria A; Stancanelli B; Troffa C; Thijs L; Rizzi F; Simonova G; Lupoli S; Argiolas G; Braga D; D'Alessio MC; Ortu MF; Ricceri F; Mercurio M; Descombes P; Marconi M; Chalmers J; Harrap S; Filipovsky J; Bochud M; Iacoviello L; Ellis J; Stanton AV; Laan M; Padmanabhan S; Dominiczak AF; Samani NJ; Melander O; Jeunemaitre X; Manunta P; Shabo A; Vineis P; Cappuccio FP; Caulfield MJ; Matullo G; Rivolta C; Munroe PB; Barlassina C; Staessen JA; Beckmann JS; Cusi D. Genomewide Association Study Using a High-Density Single Nucleotide Polymorphism Array and Case-Control Design Identifies a Novel Essential Hypertension Susceptibility Locus in the Promoter Region of Endothelial NO Synthase. *Hypertension*. 2011 Dec 19. [Epub ahead of print] PubMed PMID: 22184326.

34. Penninx BW, Beekman AT, Smit JH, et al. The Netherlands Study of Depression and Anxiety (NESDA): Rationale, Objectives and Methods. *Int J Methods Psychiatr Res.* 2008;17(3):121-140. [PMID: 18763692]
35. Krawczak M, Nikolaus S, von Eberstein H, Croucher PJ, El Mokhtari NE, Schreiber S. PopGen: population-based recruitment of patients and controls for the analysis of complex genotype-phenotype relationships. *Community Genet.* 2006;9(1):55-61. (PMID: 17339269)
36. van der Velde M, Halbesma N, de Charro FT, Bakker SJ, de Zeeuw D, de Jong PE, Gansevoort RT. Screening for albuminuria identifies individuals at increased renal risk. *J Am Soc Nephrol.* 2009;20:852-62.
37. Heid IM, Wagner SA, Gohlke H, Iglseider B, Mueller JC, Cip P, Ladurner G, Reiter R, Stadlmayr A, Mackevics V, Illig T, Kronenberg F, Paulweber B: Genetic architecture of the APM1 gene and its influence on adiponectin plasma levels and parameters of the metabolic syndrome in 1,727 healthy Caucasians. *Diabetes* 55:375-384, 2006. (PMID: 16443770).
38. Kollerits B, Coassin S, Kiechl S, Hunt SC, Paulweber B, Willeit J, Brandstätter A, Lamina C, Adams TD, Kronenberg F: A common variant in the adiponutrin gene influences liver enzyme levels. *Journal of Medical Genetics* 47:116-119, 2010. (PMID: 19542081)
39. Raitakari OT, Juonala M, Rönkämaa T, Keltikangas-Järvinen L, Räsänen L, et al. (2008) Cohort profile: The cardiovascular risk in Young Finns Study. *Int J Epidemiol* 37(6): 1220-1226. spectrum of disease phenotypes. *Gesundheitswesen* 67 Suppl 1: S26-30.31(3): 222-229.
